# Supplementary material for: High-resolution structural variants catalogue in a large-scale whole genome sequenced bovine family cohort data
Source: BMC Genomics. 2023 May 1;24:225. doi: 10.1186/s12864-023-09259-8 (PMC10152703; doi:10.1186/s12864-023-09259-8)
Supplement: Supplementary file 2 — Additional file 2: Supplementary table 1. A list of structural variants identified in the current study and their cooridnates, length, type, category, allele frequency, whether a SV was validated or not via the 50K SNP genotyping approach, and genic overlap are shown in the table. Supplementary table 2. A list of 127 trios and the corresponding animal IDs for each trio. [file 12864_2023_9259_MOESM2_ESM.xlsx]

## Sheet: Supplementary Table 1
SV_ID	SV_Coordinates	SV_Length	SVTYPE	Category	Allele_Frequency	Validated_with_50K_genotyping_approach	Genic Overlap
5902	chr1:286843-286896	53	DEL	Lenient	0.533835
5904	chr1:383193-391717	8524	DEL	Lenient	0.584586
5905	chr1:426573-427580	1007	DEL	Lenient	0.473684
5906	chr1:430006-430258	252	DEL	Lenient	0.441729
5908	chr1:483218-491789	8571	DEL	Lenient	0.883459
5913	chr1:1579581-1579949	368	DEL	Lenient	0.257519
5914	chr1:1628981-1629192	211	DEL	Lenient	0.0319549
5915	chr1:1895460-1896026	566	DEL	Stringent	0.0451128
5916	chr1:2044344-2046202	1858	DEL	Stringent	0.0093985
5917	chr1:2136962-2146276	9314	DEL	Stringent	0.0037594
5918	chr1:2398483-2398875	392	DEL	Stringent	0.037594		ENSBTAG00000051429
5919	chr1:2730336-2730427	91	DEL	Lenient	0.306391
5920	chr1:3014715-3015906	1191	DEL	Lenient	0.0037594
5921	chr1:3456013-3456239	226	DEL	Lenient	0.0357143
5923	chr1:3725821-3726061	240	DEL	Lenient	0.379699
5925	chr1:3850765-3851659	894	DEL	Lenient	0.018797
5926	chr1:3983088-3984562	1474	DEL	Stringent	0.107143
5928	chr1:4842343-4843704	1361	DEL	Lenient	0.0545113
5929	chr1:4879957-4881835	1878	DEL	Stringent	0.0639098
5932	chr1:5256465-5295742	39277	DEL	Lenient	0.0150376
5933	chr1:5285245-5293447	8202	DEL	Lenient	0.0300752
5935	chr1:5872170-5873000	830	DEL	Stringent	0.18609
5936	chr1:5962361-5965847	3486	DEL	Lenient	0.915414
5937	chr1:6001643-6002108	465	DEL	Lenient	0.114662
5938	chr1:6757836-6763111	5275	DEL	Stringent	0.0150376
5939	chr1:6799482-6800105	623	DEL	Stringent	0.0244361
5940	chr1:7245923-7246654	731	DEL	Lenient	0.31203		ENSBTAG00000038433
5941	chr1:7447649-7447726	77	DEL	Lenient	0.492453
5942	chr1:7652741-7653424	683	DEL	Stringent	0.110902
5944	chr1:8623859-8624088	229	DEL	Lenient	0.263158
5946	chr1:9037115-9038545	1430	DEL	Lenient	0.107143
5947	chr1:9111030-9111301	271	DEL	Lenient	0.0469925
5949	chr1:9136781-9137482	701	DEL	Stringent	0.0902256
5951	chr1:9730409-9730576	167	DEL	Lenient	0.0695489
5952	chr1:9862295-9862544	249	DEL	Lenient	0.293233
5953	chr1:10010380-10011365	985	DEL	Stringent	0.0620301
5954	chr1:10087388-10088679	1291	DEL	Lenient	0.0770677
5955	chr1:10109377-10109430	53	DEL	Lenient	0.0093985
5956	chr1:10458335-10458500	165	DEL	Lenient	0.0244361
5957	chr1:10493972-10494045	73	DEL	Lenient	0.533835
5958	chr1:10537359-10541151	3792	DEL	Stringent	0.0112782
5960	chr1:10608206-10625769	17563	DEL	Stringent	0.0112782
5961	chr1:10629246-10629382	136	DEL	Lenient	0.270677
5962	chr1:11170418-11173287	2869	DEL	Stringent	0.0864662
5963	chr1:11466520-11467480	960	DEL	Stringent	0.787594
5964	chr1:11637124-11639207	2083	DEL	Stringent	0.0018797
5965	chr1:11649654-11654956	5302	DEL	Lenient	0.0263158
5966	chr1:11667465-11668783	1318	DEL	Stringent	0.0037594
5967	chr1:11718749-11718968	219	DEL	Lenient	0.221805
5968	chr1:11764760-11764860	100	DEL	Stringent	0.798872
5969	chr1:11784297-11784610	313	DEL	Lenient	0.118421
5970	chr1:11833827-11836598	2771	DEL	Lenient	0.345865
5972	chr1:12374746-12380311	5565	DEL	Lenient	0.0789474
5973	chr1:12379718-12380912	1194	DEL	Lenient	0.0093985
5974	chr1:12576128-12576734	606	DEL	Stringent	0.0789474
5975	chr1:12682589-12682666	77	DEL	Lenient	0.191729
5976	chr1:12712596-12712844	248	DEL	Stringent	0.0056391
5977	chr1:12827447-12827522	75	DEL	Lenient	0.0977444
5978	chr1:12854421-12854698	277	DEL	Lenient	0.528196
5979	chr1:12997142-13000822	3680	DEL	Lenient	0.394737
5980	chr1:13025010-13026464	1454	DEL	Lenient	0.018797
5981	chr1:13047217-13049906	2689	DEL	Lenient	0.0808271
5982	chr1:13089080-13089201	121	DEL	Lenient	0.930451
5983	chr1:13096838-13099486	2648	DEL	Stringent	0.930451
5984	chr1:13219598-13219681	83	DEL	Stringent	0.988722
5985	chr1:13500297-13500546	249	DEL	Lenient	0.979323
5986	chr1:13519205-13519640	435	DEL	Stringent	0.178571
5987	chr1:13555603-13558328	2725	DEL	Stringent	0.975564
5988	chr1:13572176-13573226	1050	DEL	Stringent	0.975564
5989	chr1:13599419-13599724	305	DEL	Lenient	0.62594
5991	chr1:13870644-13870730	86	DEL	Lenient	0.018797
5992	chr1:13910906-13913572	2666	DEL	Lenient	0.0827068
5995	chr1:14172952-14173626	674	DEL	Stringent	0.018797
5996	chr1:14179038-14180276	1238	DEL	Stringent	0.018797
5997	chr1:14251302-14259682	8380	DEL	Stringent	0.763158
6001	chr1:14344328-14344634	306	DEL	Lenient	0.473684
6002	chr1:14352529-14352669	140	DEL	Lenient	0.207547
6003	chr1:14396368-14397359	991	DEL	Lenient	0.172932
6004	chr1:14530983-14532011	1028	DEL	Stringent	0.0921053
6005	chr1:14556138-14557141	1003	DEL	Stringent	0.0150376
6006	chr1:14582197-14582266	69	DEL	Lenient	0.0451128
6007	chr1:14598221-14598376	155	DEL	Lenient	0.321429
6008	chr1:14639304-14639641	337	DEL	Lenient	0.616541
6009	chr1:14652171-14652489	318	DEL	Lenient	0.0432331
6010	chr1:14686559-14687094	535	DEL	Stringent	0.0131579
6011	chr1:14692978-14693029	51	DEL	Lenient	0.280075
6012	chr1:14699140-14699506	366	DEL	Lenient	0.278196
6013	chr1:14721395-14721475	80	DEL	Lenient	0.018797
6014	chr1:14724432-14724915	483	DEL	Lenient	0.0808271
6015	chr1:14768657-14769831	1174	DEL	Lenient	0.458647
6016	chr1:14783845-14783945	100	DEL	Lenient	0.477444
6017	chr1:14875933-14877121	1188	DEL	Stringent	0.795113
6018	chr1:14878863-14878965	102	DEL	Lenient	0.460843
6019	chr1:14950235-14951721	1486	DEL	Lenient	0.184211
6020	chr1:14956070-14956174	104	DEL	Lenient	0.206767
6022	chr1:15026137-15026201	64	DEL	Lenient	0.0206767
6023	chr1:15191809-15192408	599	DEL	Lenient	0.783835
6024	chr1:15584376-15587931	3555	DEL	Stringent	0.774436
6025	chr1:15632445-15632503	58	DEL	Lenient	0.204887
6027	chr1:16097541-16098058	517	DEL	Lenient	0.225564
6028	chr1:16150189-16150258	69	DEL	Lenient	0.291353
6030	chr1:16233256-16233873	617	DEL	Stringent	0.148496
6032	chr1:16373135-16376230	3095	DEL	Stringent	0.107143
6033	chr1:16441265-16441406	141	DEL	Lenient	0.370301
6034	chr1:16505351-16505757	406	DEL	Lenient	0.710526
6035	chr1:16531179-16539744	8565	DEL	Lenient	0.0526316
6036	chr1:16648629-16649336	707	DEL	Lenient	0.216165
6037	chr1:16950552-16951026	474	DEL	Lenient	0.855263
6038	chr1:16989135-16989348	213	DEL	Lenient	0.778196
6039	chr1:17060699-17060929	230	DEL	Lenient	0.0902256
6041	chr1:17236592-17238290	1698	DEL	Stringent	0.161654
6042	chr1:17463683-17464230	547	DEL	Stringent	0.695489
6043	chr1:17869753-17869854	101	DEL	Lenient	0.0075188
6044	chr1:17939167-17940408	1241	DEL	Stringent	0.0733083
6045	chr1:18024616-18024817	201	DEL	Stringent	0.0714286
6046	chr1:18284654-18285135	481	DEL	Lenient	0.494361
6047	chr1:18324086-18328753	4667	DEL	Stringent	0.0394737
6048	chr1:18418521-18418930	409	DEL	Stringent	0.0263158
6049	chr1:18468599-18469634	1035	DEL	Stringent	0.0056391
6050	chr1:18474933-18475459	526	DEL	Stringent	0.330827
6051	chr1:18513115-18513200	85	DEL	Lenient	0.25188
6052	chr1:18597759-18597970	211	DEL	Lenient	0.0601504
6053	chr1:18782838-18783026	188	DEL	Lenient	0.157895
6054	chr1:18786950-18787578	628	DEL	Lenient	0.0112782
6058	chr1:20224773-20224945	172	DEL	Lenient	0.595865
6059	chr1:20373381-20373556	175	DEL	Lenient	0.340226
6061	chr1:20654909-20656831	1922	DEL	Stringent	0.0263158
6062	chr1:20668146-20674630	6484	DEL	Stringent	0.0112782
6063	chr1:20687067-20687263	196	DEL	Lenient	0.0300752
6065	chr1:21209754-21210251	497	DEL	Stringent	0.0300752
6066	chr1:21365074-21366365	1291	DEL	Lenient	0.441729
6067	chr1:21537547-21537786	239	DEL	Lenient	0.149425
6069	chr1:22397639-22397842	203	DEL	Lenient	0.56391
6071	chr1:22618030-22618117	87	DEL	Lenient	0.610902
6072	chr1:22868291-22871876	3585	DEL	Lenient	0.0319549
6073	chr1:22890726-22891086	360	DEL	Lenient	0.325188
6074	chr1:22910552-22910941	389	DEL	Lenient	0.321429
6077	chr1:23077227-23080190	2963	DEL	Lenient	0.295113
6078	chr1:23103339-23107566	4227	DEL	Stringent	0.353383
6079	chr1:23171192-23171244	52	DEL	Lenient	0.668561
6080	chr1:23421212-23421379	167	DEL	Lenient	0.0244361
6082	chr1:23520065-23520154	89	DEL	Lenient	0.0808271
6083	chr1:23557292-23557471	179	DEL	Lenient	0.864662
6084	chr1:23561024-23561537	513	DEL	Stringent	0.0827068
6085	chr1:23760197-23760253	56	DEL	Lenient	0.0845865
6086	chr1:23802690-23802962	272	DEL	Stringent	0.0357143
6087	chr1:23877113-23877225	112	DEL	Lenient	0.43609
6089	chr1:24163966-24164232	266	DEL	Lenient	0.0432331
6090	chr1:24223861-24225447	1586	DEL	Stringent	0.0037594
6091	chr1:24254612-24255498	886	DEL	Stringent	0.225564
6092	chr1:24495947-24496327	380	DEL	Lenient	0.0883459
6093	chr1:24559729-24562284	2555	DEL	Stringent	0.159774
6094	chr1:24560963-24561177	214	DEL	Lenient	0.216216
6098	chr1:25152029-25152938	909	DEL	Lenient	0.270677
6099	chr1:25422148-25443364	21216	DEL	Lenient	0.148496
6101	chr1:25581897-25581958	61	DEL	Lenient	0.330827
6102	chr1:25709981-25710728	747	DEL	Stringent	0.704887
6103	chr1:25722603-25736524	13921	DEL	Stringent	0.161654
6104	chr1:25724384-25724900	516	DEL	Lenient	0.0152091
6105	chr1:25996475-25996848	373	DEL	Lenient	0.785714
6106	chr1:26221100-26221736	636	DEL	Lenient	0.0112782
6107	chr1:26352018-26353862	1844	DEL	Stringent	0.178571
6109	chr1:26710251-26710528	277	DEL	Lenient	0.176692
6110	chr1:26731853-26732491	638	DEL	Lenient	0.522556
6111	chr1:26775068-26775148	80	DEL	Stringent	0.994361
6113	chr1:26948772-26948848	76	DEL	Lenient	0.904135
6114	chr1:26967739-26978503	10764	DEL	Stringent	0.0056391
6115	chr1:27078270-27078322	52	DEL	Lenient	0.140977
6118	chr1:27181800-27182394	594	DEL	Stringent	0.0394737
6119	chr1:27265677-27265994	317	DEL	Lenient	0.0338346
6121	chr1:27391482-27391865	383	DEL	Lenient	0.556391
6123	chr1:27751175-27752473	1298	DEL	Lenient	0.218045
6124	chr1:27955933-27956199	266	DEL	Lenient	0.631579
6125	chr1:27987730-27987958	228	DEL	Lenient	0.0695489
6126	chr1:28016582-28017245	663	DEL	Stringent	0.744361
6127	chr1:28123443-28128968	5525	DEL	Stringent	0.129699	validated
6128	chr1:28390389-28391187	798	DEL	Lenient	0.118421
6129	chr1:28427460-28427596	136	DEL	Lenient	0.881579
6130	chr1:28497825-28498176	351	DEL	Lenient	0.375472
6131	chr1:28753828-28754302	474	DEL	Lenient	0.323308
6133	chr1:29447782-29449649	1867	DEL	Stringent	0.298872
6134	chr1:29710730-29710885	155	DEL	Lenient	0.142857
6135	chr1:29736755-29736823	68	DEL	Lenient	0.0996241
6136	chr1:29758356-29759579	1223	DEL	Stringent	0.101504
6138	chr1:29866354-29866651	297	DEL	Lenient	0.0676692
6139	chr1:29943142-29943842	700	DEL	Stringent	0.0150376
6140	chr1:30379723-30379776	53	DEL	Lenient	0.0601504
6141	chr1:30382271-30383094	823	DEL	Stringent	0.637218
6142	chr1:30456243-30456344	101	DEL	Lenient	0.0075188
6143	chr1:30457744-30460356	2612	DEL	Lenient	0.0075188
6144	chr1:30641231-30641281	50	DEL	Stringent	0.87594
6145	chr1:30682619-30682677	58	DEL	Lenient	0.0018797
6146	chr1:30990557-30991053	496	DEL	Lenient	0.0883459
6147	chr1:30993640-30993699	59	DEL	Lenient	0.148496
6148	chr1:31076299-31076420	121	DEL	Lenient	0.526316
6149	chr1:31170229-31170343	114	DEL	Lenient	0.0169173
6150	chr1:31180435-31188971	8536	DEL	Lenient	0.225564
6151	chr1:31686803-31687679	876	DEL	Stringent	0.922932
6152	chr1:31775660-31775737	77	DEL	Lenient	0.037594
6153	chr1:31782660-31785023	2363	DEL	Stringent	0.0075188
6154	chr1:31852148-31852378	230	DEL	Stringent	0.0037594
6155	chr1:31917512-31918215	703	DEL	Lenient	0.257519
6156	chr1:32101019-32102017	998	DEL	Lenient	0.674812
6157	chr1:32157402-32157529	127	DEL	Lenient	0.637218
6160	chr1:32244307-32245076	769	DEL	Stringent	0.12782
6161	chr1:32292226-32293712	1486	DEL	Stringent	0.776316
6163	chr1:32335374-32335714	340	DEL	Lenient	0.12782
6164	chr1:32336096-32336248	152	DEL	Lenient	0.12782
6166	chr1:32577728-32578886	1158	DEL	Lenient	0.355263
6167	chr1:32635631-32637079	1448	DEL	Lenient	0.460526
6168	chr1:32891592-32891642	50	DEL	Lenient	0.018797
6169	chr1:32958974-32961835	2861	DEL	Lenient	0.216165
6170	chr1:32986378-32987358	980	DEL	Stringent	0.0338346
6171	chr1:33091000-33091315	315	DEL	Lenient	0.140977
6172	chr1:33092918-33093365	447	DEL	Lenient	0.146617
6174	chr1:33262831-33263415	584	DEL	Lenient	0.0112782
6175	chr1:33609519-33609631	112	DEL	Lenient	0.0319549
6176	chr1:33738782-33738954	172	DEL	Lenient	0.0357143
6177	chr1:33948983-33950030	1047	DEL	Stringent	0.0582707
6178	chr1:33987618-33987841	223	DEL	Stringent	0.0488722
6179	chr1:34134684-34136713	2029	DEL	Stringent	0.0319549
6180	chr1:34139202-34140131	929	DEL	Stringent	0.0206767
6181	chr1:34150020-34151844	1824	DEL	Lenient	0.0319549
6182	chr1:34391798-34394674	2876	DEL	Stringent	0.821429
6183	chr1:34421013-34421423	410	DEL	Lenient	0.281955
6184	chr1:34605909-34606058	149	DEL	Lenient	0.451128
6185	chr1:35027491-35028254	763	DEL	Lenient	0.319392
6186	chr1:35027425-35033633	6208	DEL	Stringent	0.154135
6187	chr1:35528245-35533923	5678	DEL	Lenient	0.12218
6188	chr1:35616149-35616375	226	DEL	Lenient	0.244361
6189	chr1:35769597-35772809	3212	DEL	Stringent	0.0582707	validated
6191	chr1:35856653-35856986	333	DEL	Lenient	0.0657895
6192	chr1:36042595-36047598	5003	DEL	Lenient	0.0093985
6197	chr1:36064229-36119509	55280	DEL	Lenient	0.323308		ENSBTAG00000023675(ZNF654)
6201	chr1:36332362-36333083	721	DEL	Stringent	0.25188
6202	chr1:36419810-36419890	80	DEL	Lenient	0.31391
6203	chr1:36625289-36627016	1727	DEL	Lenient	0.590226
6204	chr1:36713944-36714005	61	DEL	Lenient	0.0808271
6205	chr1:36803623-36807131	3508	DEL	Lenient	0.210526
6206	chr1:36827416-36827598	182	DEL	Lenient	0.142857
6207	chr1:36888773-36889478	705	DEL	Lenient	0.133459
6208	chr1:36890306-36891760	1454	DEL	Stringent	0.133459
6209	chr1:37081206-37081439	233	DEL	Stringent	0.0582707
6210	chr1:37248355-37248408	53	DEL	Lenient	0.0225564
6211	chr1:37280296-37280825	529	DEL	Stringent	0.853383
6212	chr1:37286462-37290314	3852	DEL	Stringent	0.142857
6213	chr1:37323674-37324991	1317	DEL	Lenient	0.74812
6214	chr1:37445493-37446698	1205	DEL	Stringent	0.0432331
6216	chr1:37680273-37681090	817	DEL	Lenient	0.112782
6217	chr1:37735212-37735266	54	DEL	Lenient	0.0657895
6218	chr1:37737996-37738060	64	DEL	Lenient	0.434211
6219	chr1:38384496-38384571	75	DEL	Lenient	0.037594
6220	chr1:38673637-38674631	994	DEL	Lenient	0.0977444
6221	chr1:38675845-38676246	401	DEL	Lenient	0.193609
6222	chr1:38878447-38879573	1126	DEL	Stringent	0.599624
6223	chr1:38890405-38890465	60	DEL	Lenient	0.0977444
6224	chr1:39168063-39168543	480	DEL	Lenient	0.199248
6225	chr1:39265211-39265267	56	DEL	Lenient	0.734962
6226	chr1:39375883-39376752	869	DEL	Lenient	0.0056391
6227	chr1:39377980-39378031	51	DEL	Lenient	0.240602
6228	chr1:39538525-39539276	751	DEL	Stringent	0.977444
6229	chr1:39680342-39680395	53	DEL	Lenient	0.0808271
6231	chr1:40084926-40085020	94	DEL	Lenient	0.0451128
6232	chr1:40243423-40243526	103	DEL	Lenient	0.0451128
6233	chr1:40243976-40245641	1665	DEL	Stringent	0.0451128
6234	chr1:40279707-40280950	1243	DEL	Lenient	0.0770677
6235	chr1:40375915-40376661	746	DEL	Lenient	0.0093985
6236	chr1:40377819-40381941	4122	DEL	Stringent	0.0037594
6237	chr1:40472360-40472980	620	DEL	Stringent	0.990601
6238	chr1:40641835-40642587	752	DEL	Lenient	0.0093985
6239	chr1:40679961-40680094	133	DEL	Stringent	0.943609
6240	chr1:41280217-41280500	283	DEL	Lenient	0.509399
6241	chr1:41328797-41339317	10520	DEL	Stringent	0.171053
6242	chr1:41341616-41342022	406	DEL	Lenient	0.823308
6243	chr1:41463127-41463831	704	DEL	Stringent	0.0075188
6244	chr1:41544736-41553150	8414	DEL	Stringent	0.056391
6245	chr1:41565343-41567257	1914	DEL	Lenient	0.037594
6246	chr1:41617618-41618823	1205	DEL	Stringent	0.306391
6248	chr1:42100314-42101289	975	DEL	Lenient	0.550752
6249	chr1:42176816-42176976	160	DEL	Lenient	0.0225564
6250	chr1:42207485-42207939	454	DEL	Lenient	0.755639
6251	chr1:42282402-42282574	172	DEL	Lenient	0.592105
6252	chr1:42294934-42295026	92	DEL	Lenient	0.259398
6253	chr1:42343893-42344805	912	DEL	Lenient	0.263158
6254	chr1:42451415-42451598	183	DEL	Stringent	0.0075188
6255	chr1:42454683-42456472	1789	DEL	Lenient	0.018797
6256	chr1:42491914-42586982	95068	DEL	Stringent	0.0093985		ENSBTAG00000051784, ENSBTAG00000051905
6257	chr1:42508391-42509052	661	DEL	Lenient	0.556391
6258	chr1:42515655-42516767	1112	DEL	Lenient	0.308271
6259	chr1:42537869-42544268	6399	DEL	Lenient	0.601504
6260	chr1:42581433-42587039	5606	DEL	Lenient	0.969925
6261	chr1:42639787-42639964	177	DEL	Lenient	0.657895
6262	chr1:42666406-42667551	1145	DEL	Lenient	0.018797
6263	chr1:42718617-42718673	56	DEL	Lenient	0.0582707
6265	chr1:42757923-42758485	562	DEL	Stringent	0.0582707
6266	chr1:42850158-42852156	1998	DEL	Stringent	0.0169173
6267	chr1:43219013-43219720	707	DEL	Stringent	0.212406
6268	chr1:43274836-43275309	473	DEL	Lenient	0.159774
6269	chr1:43710119-43711207	1088	DEL	Lenient	0.308271
6270	chr1:43876373-43876890	517	DEL	Stringent	0.0056391
6273	chr1:44533417-44535506	2089	DEL	Stringent	0.93985
6279	chr1:44905477-44913508	8031	DEL	Stringent	0.0639098
6280	chr1:45264854-45265085	231	DEL	Lenient	0.0958647
6281	chr1:45981631-45982256	625	DEL	Lenient	0.18985
6288	chr1:46033455-46033681	226	DEL	Lenient	0.0300752
6289	chr1:46308586-46309830	1244	DEL	Lenient	0.257519
6291	chr1:46771314-46771387	73	DEL	Stringent	0.0056391
6292	chr1:46828337-46828882	545	DEL	Lenient	0.193609
6293	chr1:46844790-46846473	1683	DEL	Stringent	0.18797
6294	chr1:46864837-46865134	297	DEL	Lenient	0.0244361
6295	chr1:47152321-47152413	92	DEL	Stringent	0.0037594
6296	chr1:47651472-47652567	1095	DEL	Stringent	0.896617
6297	chr1:47656427-47656492	65	DEL	Stringent	0.0037594
6298	chr1:47659379-47660072	693	DEL	Lenient	0.896617
6299	chr1:47660750-47660811	61	DEL	Lenient	0.898496
6300	chr1:47671695-47672411	716	DEL	Lenient	0.432331
6301	chr1:47714773-47716967	2194	DEL	Stringent	0.0093985
6302	chr1:47766092-47766281	189	DEL	Lenient	0.0864662
6303	chr1:47788809-47790500	1691	DEL	Stringent	0.0996241
6304	chr1:47904094-47904297	203	DEL	Lenient	0.0169173
6305	chr1:47974663-47974926	263	DEL	Lenient	0.567669
6307	chr1:48008186-48008517	331	DEL	Stringent	0.0056391
6308	chr1:48127562-48127703	141	DEL	Lenient	0.847744
6309	chr1:48151218-48154425	3207	DEL	Stringent	0.87782
6310	chr1:48176959-48177016	57	DEL	Lenient	0.0319549
6311	chr1:48320086-48320338	252	DEL	Stringent	0.018797
6312	chr1:48330713-48331533	820	DEL	Stringent	0.018797
6313	chr1:48331063-48331176	113	DEL	Lenient	0.0056391
6314	chr1:48340240-48340294	54	DEL	Lenient	0.0150376
6315	chr1:48382885-48383472	587	DEL	Lenient	0.116541
6316	chr1:48432962-48433160	198	DEL	Lenient	0.0037594
6317	chr1:48468096-48470000	1904	DEL	Lenient	0.018797
6318	chr1:48595572-48595845	273	DEL	Lenient	0.037594
6319	chr1:48604505-48604642	137	DEL	Lenient	0.184211
6320	chr1:48795879-48802085	6206	DEL	Lenient	0.37782
6321	chr1:48873756-48873844	88	DEL	Lenient	0.018797
6322	chr1:48991794-48992967	1173	DEL	Lenient	0.496241
6323	chr1:49038603-49038685	82	DEL	Lenient	0.0620301
6324	chr1:49148285-49149025	740	DEL	Lenient	0.830827
6325	chr1:49172490-49173555	1065	DEL	Stringent	0.0770677
6326	chr1:49188471-49188746	275	DEL	Lenient	0.075188
6327	chr1:49233674-49233736	62	DEL	Lenient	0.0037594
6328	chr1:49237922-49237981	59	DEL	Lenient	0.0037594
6329	chr1:49297060-49297523	463	DEL	Lenient	0.296992
6330	chr1:49363514-49367735	4221	DEL	Lenient	0.218045
6331	chr1:49373468-49375291	1823	DEL	Stringent	0.0018797
6332	chr1:49720470-49720712	242	DEL	Lenient	0.133459
6333	chr1:49751246-49753610	2364	DEL	Stringent	0.0244361
6335	chr1:50153285-50154304	1019	DEL	Lenient	0.477444
6336	chr1:50250605-50250668	63	DEL	Lenient	0.056391
6337	chr1:50622942-50623926	984	DEL	Stringent	0.0601504
6338	chr1:50663257-50663312	55	DEL	Lenient	0.25
6339	chr1:50923159-50923908	749	DEL	Lenient	0.140977
6340	chr1:51024239-51024676	437	DEL	Lenient	0.199248
6342	chr1:51163564-51164031	467	DEL	Lenient	0.0488722
6343	chr1:51265071-51265231	160	DEL	Lenient	0.0657895
6344	chr1:51302948-51303019	71	DEL	Lenient	0.018797
6346	chr1:51636776-51637579	803	DEL	Stringent	0.0037594
6347	chr1:51713376-51719190	5814	DEL	Lenient	0.0996241
6348	chr1:51762310-51762762	452	DEL	Stringent	0.018797
6350	chr1:51871802-51872767	965	DEL	Lenient	0.0451128
6351	chr1:51972993-51974821	1828	DEL	Lenient	0.236842
6353	chr1:53347983-53348850	867	DEL	Stringent	0.0056391
6354	chr1:53608566-53608791	225	DEL	Lenient	0.018797
6355	chr1:53809570-53809659	89	DEL	Lenient	0.417293
6356	chr1:53823787-53823847	60	DEL	Lenient	0.0996241
6357	chr1:53930051-53930216	165	DEL	Lenient	0.430451
6358	chr1:53964536-53964655	119	DEL	Lenient	0.460526
6359	chr1:54080472-54081970	1498	DEL	Stringent	0.210526
6363	chr1:55103920-55112456	8536	DEL	Lenient	0.12594
6364	chr1:55239962-55240313	351	DEL	Lenient	0.274436
6365	chr1:55243237-55244791	1554	DEL	Stringent	0.87782
6366	chr1:55457784-55460545	2761	DEL	Lenient	0.368421		ENSBTAG00000033360
6367	chr1:55630190-55631010	820	DEL	Lenient	0.0714286
6368	chr1:55708983-55709186	203	DEL	Lenient	0.263158
6369	chr1:56128211-56128935	724	DEL	Lenient	0.172932
6370	chr1:56161670-56161896	226	DEL	Lenient	0.351504
6371	chr1:56169128-56170425	1297	DEL	Stringent	0.0281955
6372	chr1:56265450-56265594	144	DEL	Stringent	0.0244361
6373	chr1:56613250-56613449	199	DEL	Lenient	0.81015
6374	chr1:56949604-56950251	647	DEL	Stringent	0.859023
6376	chr1:57204264-57217160	12896	DEL	Lenient	0.0545113
6377	chr1:57572000-57573344	1344	DEL	Lenient	0.133459
6379	chr1:57863385-57864498	1113	DEL	Lenient	0.238722
6381	chr1:57940378-57942325	1947	DEL	Stringent	0.665414
6382	chr1:58227795-58230223	2428	DEL	Lenient	0.763158
6383	chr1:58437802-58439180	1378	DEL	Lenient	0.0150376
6385	chr1:59114278-59114363	85	DEL	Lenient	0.0056391
6386	chr1:59784739-59784813	74	DEL	Lenient	0.0639098
6387	chr1:59999507-59999766	259	DEL	Lenient	0.490602
6388	chr1:60268395-60268475	80	DEL	Lenient	0.906015
6389	chr1:60382903-60383372	469	DEL	Stringent	0.0357143
6390	chr1:60510957-60511126	169	DEL	Lenient	0.204887
6391	chr1:60563462-60564323	861	DEL	Stringent	0.0206767
6392	chr1:60727214-60727489	275	DEL	Lenient	0.167293
6394	chr1:61001679-61002397	718	DEL	Stringent	0.0112782
6395	chr1:61170173-61171233	1060	DEL	Lenient	0.12594
6398	chr1:61202769-61204166	1397	DEL	Stringent	0.983083
6399	chr1:61266815-61267539	724	DEL	Lenient	0.0601504
6400	chr1:61267619-61268061	442	DEL	Stringent	0.0601504
6401	chr1:61325706-61325770	64	DEL	Lenient	0.453008
6402	chr1:61389368-61397897	8529	DEL	Stringent	0.496241		ENSBTAG00000048985
6403	chr1:61570127-61570199	72	DEL	Lenient	0.0244361
6404	chr1:61631443-61633142	1699	DEL	Stringent	0.0018797
6405	chr1:62038165-62038453	288	DEL	Stringent	0.0093985
6406	chr1:62056504-62056578	74	DEL	Lenient	0.25
6407	chr1:62156374-62164160	7786	DEL	Stringent	0.12782
6408	chr1:62574966-62576250	1284	DEL	Lenient	0.180451
6409	chr1:62591055-62591128	73	DEL	Lenient	0.0507519
6410	chr1:62940910-62941223	313	DEL	Lenient	0.0206767
6411	chr1:63086350-63086416	66	DEL	Lenient	0.0112782
6414	chr1:63943056-63943140	84	DEL	Lenient	0.0281955
6415	chr1:64099349-64100606	1257	DEL	Stringent	0.0263158
6416	chr1:64465030-64465291	261	DEL	Lenient	0.842105
6417	chr1:64880271-64882734	2463	DEL	Stringent	0.0845865
6418	chr1:65092575-65092828	253	DEL	Lenient	0.951128
6419	chr1:65184016-65186924	2908	DEL	Stringent	0.62218
6420	chr1:65527249-65528052	803	DEL	Lenient	0.390977
6422	chr1:65722397-65722456	59	DEL	Stringent	0.0037594
6423	chr1:65849722-65849812	90	DEL	Stringent	0.971804
6424	chr1:65940717-65941143	426	DEL	Lenient	0.556391
6425	chr1:66026928-66027875	947	DEL	Lenient	0.56015
6426	chr1:66240805-66244242	3437	DEL	Lenient	0.103383
6427	chr1:66443023-66443561	538	DEL	Stringent	0.0733083
6429	chr1:66897936-66898051	115	DEL	Lenient	0.347744
6430	chr1:67283305-67283359	54	DEL	Lenient	0.787879
6431	chr1:67488078-67491042	2964	DEL	Stringent	0.654135	validated
6435	chr1:69352625-69352904	279	DEL	Lenient	0.503759
6436	chr1:69356031-69356513	482	DEL	Lenient	0.582707
6437	chr1:69402206-69410253	8047	DEL	Lenient	0.0338346
6438	chr1:69435032-69435529	497	DEL	Stringent	0.718045
6440	chr1:70343220-70343284	64	DEL	Lenient	0.271698
6442	chr1:70586326-70586802	476	DEL	Lenient	0.556391
6443	chr1:70608171-70608349	178	DEL	Lenient	0.321429
6447	chr1:71342888-71343030	142	DEL	Lenient	0.118421
6448	chr1:71383683-71387213	3530	DEL	Lenient	0.0150376
6449	chr1:72172679-72173023	344	DEL	Lenient	0.325188
6450	chr1:72188430-72188845	415	DEL	Stringent	0.0169173
6451	chr1:72283056-72283967	911	DEL	Stringent	0.0338346
6452	chr1:72798694-72798968	274	DEL	Lenient	0.0545113
6454	chr1:74295677-74299227	3550	DEL	Stringent	0.0169173
6455	chr1:74305856-74307380	1524	DEL	Stringent	0.0112782
6457	chr1:75434232-75440643	6411	DEL	Stringent	0.142857
6458	chr1:75441562-75442297	735	DEL	Lenient	0.142857
6459	chr1:75502551-75502653	102	DEL	Lenient	0.701128
6460	chr1:75519808-75519933	125	DEL	Lenient	0.68985
6462	chr1:75704003-75705023	1020	DEL	Lenient	0.0488722
6463	chr1:75807792-75807843	51	DEL	Lenient	0.543396
6464	chr1:75944423-75944541	118	DEL	Lenient	0.0263158
6466	chr1:76216182-76216530	348	DEL	Lenient	0.225564
6467	chr1:76224109-76224258	149	DEL	Lenient	0.268797
6468	chr1:76333097-76333921	824	DEL	Lenient	0.0381679
6469	chr1:76332990-76335602	2612	DEL	Stringent	0.146617
6470	chr1:76416085-76417840	1755	DEL	Lenient	0.0338346
6471	chr1:76463017-76463743	726	DEL	Stringent	0.0902256
6472	chr1:76610160-76610522	362	DEL	Lenient	0.383459
6473	chr1:76625996-76626772	776	DEL	Lenient	0.0582707
6474	chr1:76826869-76826982	113	DEL	Lenient	0.516917
6475	chr1:76877345-76877644	299	DEL	Lenient	0.475564
6476	chr1:76996796-76999904	3108	DEL	Stringent	0.0037594
6477	chr1:77307234-77308173	939	DEL	Lenient	0.0394737
6478	chr1:77842360-77850914	8554	DEL	Lenient	0.156015
6480	chr1:78019139-78019720	581	DEL	Stringent	0.18609
6481	chr1:78186843-78188054	1211	DEL	Stringent	0.12594
6483	chr1:79202224-79204117	1893	DEL	Lenient	0.582707		ENSBTAG00000049984
6484	chr1:79646147-79649368	3221	DEL	Lenient	0.338346
6487	chr1:80110992-80111626	634	DEL	Stringent	0.0639098
6488	chr1:80228563-80228618	55	DEL	Lenient	0.075188
6489	chr1:81476362-81477645	1283	DEL	Lenient	0.716165
6490	chr1:82076171-82079783	3612	DEL	Lenient	0.131579
6491	chr1:82298344-82299139	795	DEL	Stringent	0.0357143
6492	chr1:82305679-82305826	147	DEL	Lenient	0.0338346
6496	chr1:83550870-83553021	2151	DEL	Stringent	0.0018797
6497	chr1:84290262-84290728	466	DEL	Stringent	0.129699
6498	chr1:85071822-85071936	114	DEL	Lenient	0.24812
6501	chr1:86798127-86798863	736	DEL	Lenient	0.421053
6502	chr1:86850495-86852292	1797	DEL	Lenient	0.639098
6503	chr1:86888378-86888865	487	DEL	Lenient	0.582707
6504	chr1:87017571-87017659	88	DEL	Lenient	0.056391
6505	chr1:87779108-87779191	83	DEL	Lenient	0.161654
6506	chr1:88060453-88060570	117	DEL	Lenient	0.381579
6507	chr1:88070525-88070582	57	DEL	Lenient	0.448864
6508	chr1:88085071-88086358	1287	DEL	Stringent	0.466165
6510	chr1:88187939-88187996	57	DEL	Lenient	0.206767
6511	chr1:88818341-88818547	206	DEL	Lenient	0.229323
6512	chr1:88841490-88841600	110	DEL	Lenient	0.0037594
6513	chr1:88864116-88864827	711	DEL	Stringent	0.469925
6514	chr1:88913120-88913551	431	DEL	Stringent	0.276316
6515	chr1:89044916-89045095	179	DEL	Lenient	0.018797
6516	chr1:89462008-89467247	5239	DEL	Lenient	0.766917
6517	chr1:89534737-89534788	51	DEL	Lenient	0.0657895
6519	chr1:89588277-89589079	802	DEL	Stringent	0.398496
6520	chr1:90067643-90094447	26804	DEL	Stringent	0.0300752
6521	chr1:90127071-90127222	151	DEL	Lenient	0.0639098
6523	chr1:90824861-90827494	2633	DEL	Stringent	0.0808271
6524	chr1:91147961-91148672	711	DEL	Lenient	0.176692
6525	chr1:91202736-91203214	478	DEL	Stringent	0.988722
6526	chr1:91381608-91384942	3334	DEL	Stringent	0.639098
6527	chr1:91529752-91529806	54	DEL	Lenient	0.212406
6529	chr1:91749724-91749775	51	DEL	Lenient	0.0545113
6530	chr1:91902120-91902819	699	DEL	Stringent	0.0093985
6531	chr1:91907430-91912925	5495	DEL	Lenient	0.763158
6532	chr1:92121541-92125434	3893	DEL	Stringent	0.0996241
6533	chr1:92235395-92236032	637	DEL	Stringent	0.0451128
6534	chr1:92388788-92389340	552	DEL	Lenient	0.87782
6537	chr1:93046348-93046847	499	DEL	Lenient	0.381579
6538	chr1:93363195-93766159	402964	DEL	Stringent	0.0169173		ENSBTAG00000012401, ENSBTAG00000031891(NLGN1), ENSBTAG00000046279
6540	chr1:93672149-93672689	540	DEL	Lenient	0.454887
6541	chr1:93710003-93710063	60	DEL	Stringent	0.0018797
6542	chr1:93762515-93762582	67	DEL	Lenient	0.0225564
6543	chr1:93795189-93795309	120	DEL	Lenient	0.0977444
6545	chr1:93905226-93905338	112	DEL	Lenient	0.766917
6546	chr1:93944258-93944380	122	DEL	Lenient	0.298872
6547	chr1:93944707-93944858	151	DEL	Lenient	0.298872
6548	chr1:94155662-94156244	582	DEL	Stringent	0.0657895
6549	chr1:94469782-94478386	8604	DEL	Stringent	0.0244361
6550	chr1:94666698-94667067	369	DEL	Stringent	0.056391
6551	chr1:94909890-94910458	568	DEL	Stringent	0.0977444
6552	chr1:95874533-95876724	2191	DEL	Stringent	0.49812
6553	chr1:96512211-96514908	2697	DEL	Stringent	0.834586
6555	chr1:97332671-97333240	569	DEL	Lenient	0.287594
6557	chr1:97971558-98000547	28989	DEL	Lenient	0.165414
6559	chr1:98186937-98188094	1157	DEL	Stringent	0.0018797
6560	chr1:98338590-98338685	95	DEL	Lenient	0.593985
6561	chr1:98455498-98455620	122	DEL	Lenient	0.0770677
6562	chr1:98484906-98484980	74	DEL	Lenient	0.112782
6563	chr1:98837204-98838436	1232	DEL	Lenient	0.731203
6564	chr1:99187903-99193396	5493	DEL	Lenient	0.201128
6565	chr1:99289798-99289937	139	DEL	Lenient	0.336466
6566	chr1:100048936-100050809	1873	DEL	Stringent	0.0206767
6567	chr1:100089375-100090147	772	DEL	Stringent	0.0996241
6568	chr1:100223802-100225117	1315	DEL	Lenient	0.424812
6569	chr1:100290724-100290875	151	DEL	Lenient	0.270677
6570	chr1:100331422-100331788	366	DEL	Lenient	0.733083
6571	chr1:100336994-100337701	707	DEL	Stringent	0.037594
6572	chr1:100420299-100421452	1153	DEL	Stringent	0.0075188
6573	chr1:100653079-100654244	1165	DEL	Lenient	0.199248
6574	chr1:100663487-100665369	1882	DEL	Lenient	0.259398
6575	chr1:100875121-100875695	574	DEL	Stringent	0.244361
6576	chr1:101029779-101029950	171	DEL	Lenient	0.0451128
6577	chr1:101127217-101127985	768	DEL	Stringent	0.772556
6578	chr1:101203669-101203764	95	DEL	Lenient	0.885338
6579	chr1:101271644-101271709	65	DEL	Lenient	0.169173
6580	chr1:101356380-101356468	88	DEL	Lenient	0.0037594
6581	chr1:101754581-101756763	2182	DEL	Lenient	0.0639098
6582	chr1:101911434-101911501	67	DEL	Lenient	0.588346
6583	chr1:102054722-102054837	115	DEL	Lenient	0.43985
6584	chr1:102279485-102279851	366	DEL	Lenient	0.31015
6585	chr1:102294175-102296150	1975	DEL	Lenient	0.325188
6586	chr1:102394179-102427495	33316	DEL	Stringent	0.0206767
6587	chr1:102547092-102550151	3059	DEL	Stringent	0.0357143
6588	chr1:102587238-102587506	268	DEL	Lenient	0.276316
6589	chr1:102688742-102688801	59	DEL	Lenient	0.603383
6590	chr1:102759471-102761837	2366	DEL	Stringent	0.586466
6591	chr1:102768149-102771318	3169	DEL	Stringent	0.586466		ENSBTAG00000048551
6592	chr1:102908496-102908668	172	DEL	Stringent	0.0056391
6593	chr1:102960366-102961694	1328	DEL	Stringent	0.648496
6595	chr1:102990515-102995461	4946	DEL	Lenient	0.18609
6596	chr1:103023392-103023763	371	DEL	Lenient	0.464286
6597	chr1:103188295-103189354	1059	DEL	Stringent	0.509399
6599	chr1:103269621-103272404	2783	DEL	Stringent	0.490602
6601	chr1:103769862-103769950	88	DEL	Stringent	0.0018797
6602	chr1:103933595-103934077	482	DEL	Stringent	0.0864662
6603	chr1:104096499-104097126	627	DEL	Lenient	0.695489
6605	chr1:104243961-104244106	145	DEL	Lenient	0.12218
6606	chr1:104267406-104270178	2772	DEL	Stringent	0.169173
6607	chr1:104286136-104292089	5953	DEL	Stringent	0.0206767
6608	chr1:104307602-104318295	10693	DEL	Stringent	0.0206767
6610	chr1:104824037-104824491	454	DEL	Stringent	0.0206767
6611	chr1:104914591-104914760	169	DEL	Stringent	0.0037594
6613	chr1:105172695-105174055	1360	DEL	Stringent	0.18609
6614	chr1:106077056-106084411	7355	DEL	Stringent	0.0451128
6615	chr1:106480133-106480212	79	DEL	Lenient	0.0582707
6616	chr1:106621920-106623743	1823	DEL	Stringent	0.0827068
6617	chr1:107103132-107104210	1078	DEL	Stringent	0.268797
6618	chr1:107125778-107125901	123	DEL	Lenient	0.552632
6619	chr1:107628760-107629108	348	DEL	Lenient	0.163534
6620	chr1:107675143-107675344	201	DEL	Lenient	0.0545113
6621	chr1:107879511-107880201	690	DEL	Lenient	0.268797
6622	chr1:107931080-107932380	1300	DEL	Stringent	0.056391
6623	chr1:107955699-107955766	67	DEL	Lenient	0.0469925
6626	chr1:108781889-108781949	60	DEL	Lenient	0.0206767
6627	chr1:109284853-109291338	6485	DEL	Stringent	0.0037594
6629	chr1:109317183-109317291	108	DEL	Stringent	0.0037594
6630	chr1:110019376-110140769	121393	DEL	Stringent	0.0037594		ENSBTAG00000024643(VEPH1)
6631	chr1:110128307-110129256	949	DEL	Stringent	0.0281955
6632	chr1:110423947-110424421	474	DEL	Lenient	0.221805
6633	chr1:110425438-110425642	204	DEL	Lenient	0.778196
6634	chr1:110667487-110667861	374	DEL	Lenient	0.107143
6635	chr1:110721024-110721220	196	DEL	Lenient	0.107143
6636	chr1:110762126-110762481	355	DEL	Lenient	0.142857
6637	chr1:111288111-111288211	100	DEL	Lenient	0.257519
6638	chr1:111308582-111308635	53	DEL	Lenient	0.056391
6639	chr1:111486238-111486479	241	DEL	Lenient	0.0357143
6640	chr1:111500505-111500690	185	DEL	Lenient	0.037594
6642	chr1:111574138-111574270	132	DEL	Lenient	0.114068
6643	chr1:111580737-111581214	477	DEL	Lenient	0.693609
6645	chr1:111695253-111696948	1695	DEL	Stringent	0.056391
6646	chr1:111769203-111769390	187	DEL	Lenient	0.56015
6648	chr1:112026159-112027079	920	DEL	Stringent	0.056391
6649	chr1:112546124-112547185	1061	DEL	Lenient	0.199248
6650	chr1:112728523-112729495	972	DEL	Stringent	0.986842
6651	chr1:112866837-112871901	5064	DEL	Stringent	0.037594	validated
6652	chr1:113726693-113727753	1060	DEL	Stringent	0.180451
6653	chr1:113952569-113952922	353	DEL	Lenient	0.114662
6654	chr1:114112486-114112693	207	DEL	Lenient	0.223684
6655	chr1:114147852-114148002	150	DEL	Stringent	0.0018797
6656	chr1:114177185-114177948	763	DEL	Lenient	0.203008
6657	chr1:114181545-114183586	2041	DEL	Lenient	0.204887
6658	chr1:114200669-114200801	132	DEL	Lenient	0.0733083
6659	chr1:114236227-114240985	4758	DEL	Lenient	0.0507519
6660	chr1:114329845-114331039	1194	DEL	Stringent	0.0488722
6661	chr1:114381983-114382123	140	DEL	Lenient	0.56203
6662	chr1:114527447-114527549	102	DEL	Lenient	0.263158
6663	chr1:114548487-114548557	70	DEL	Lenient	0.0883459
6664	chr1:114767425-114768571	1146	DEL	Lenient	0.0169173
6665	chr1:115315848-115315898	50	DEL	Lenient	0.0056391
6666	chr1:115548902-115549098	196	DEL	Lenient	0.710526
6667	chr1:115649184-115649261	77	DEL	Lenient	0.458647
6668	chr1:116163688-116166551	2863	DEL	Stringent	0.0507519
6669	chr1:116390371-116391153	782	DEL	Lenient	0.302632
6670	chr1:116478669-116482366	3697	DEL	Lenient	0.144737
6671	chr1:116546292-116546406	114	DEL	Lenient	0.30038
6672	chr1:117215050-117216618	1568	DEL	Lenient	0.0413534
6673	chr1:117616240-117616499	259	DEL	Lenient	0.103383
6674	chr1:117645838-117646580	742	DEL	Stringent	0.0225564
6675	chr1:117707651-117707740	89	DEL	Lenient	0.18797
6676	chr1:117780564-117782570	2006	DEL	Stringent	0.387218
6677	chr1:117985342-117985443	101	DEL	Lenient	0.347744
6678	chr1:118384309-118384385	76	DEL	Lenient	0.79434
6679	chr1:118699253-118699313	60	DEL	Lenient	0.347744
6681	chr1:119171173-119171762	589	DEL	Lenient	0.31391
6682	chr1:119231912-119235452	3540	DEL	Lenient	0.0281955
6683	chr1:119608299-119608447	148	DEL	Lenient	0.0676692
6685	chr1:119954294-119956267	1973	DEL	Lenient	0.142857
6687	chr1:120436536-120437549	1013	DEL	Lenient	0.473684
6689	chr1:121261203-121261296	93	DEL	Lenient	0.0037594
6690	chr1:121278918-121279180	262	DEL	Lenient	0.12218
6691	chr1:121305187-121305777	590	DEL	Lenient	0.0357143
6692	chr1:121360666-121360721	55	DEL	Lenient	0.74812
6695	chr1:121766538-121766886	348	DEL	Lenient	0.0338346
6696	chr1:121780828-121787807	6979	DEL	Stringent	0.381579
6698	chr1:121854925-121857469	2544	DEL	Stringent	0.62406
6700	chr1:121939295-121940010	715	DEL	Stringent	0.274436
6701	chr1:122042257-122046046	3789	DEL	Stringent	0.385338
6702	chr1:122102812-122112147	9335	DEL	Lenient	0.330827
6704	chr1:122674682-122675375	693	DEL	Lenient	0.353383
6707	chr1:123000552-123000783	231	DEL	Lenient	0.218045
6710	chr1:123165132-123174539	9407	DEL	Stringent	0.924812	validated
6711	chr1:123403737-123441395	37658	DEL	Stringent	0.101504
6713	chr1:123530075-123530783	708	DEL	Stringent	0.159774
6714	chr1:123799870-123800080	210	DEL	Lenient	0.178571
6715	chr1:123871290-123872054	764	DEL	Stringent	0.475564
6716	chr1:124006405-124008065	1660	DEL	Stringent	0.265038
6717	chr1:124355440-124356382	942	DEL	Lenient	0.12594
6718	chr1:124363306-124363573	267	DEL	Lenient	0.18985
6719	chr1:124363896-124364899	1003	DEL	Stringent	0.195489
6720	chr1:124780575-124780670	95	DEL	Lenient	0.454887
6721	chr1:124820708-124821565	857	DEL	Stringent	0.0827068
6722	chr1:125001741-125001791	50	DEL	Lenient	0.0620301
6723	chr1:125213895-125213957	62	DEL	Lenient	0.037594
6724	chr1:125259366-125259710	344	DEL	Lenient	0.129699
6725	chr1:125539247-125543632	4385	DEL	Lenient	0.787594
6727	chr1:126846341-126846522	181	DEL	Lenient	0.204887
6734	chr1:127300186-127300803	617	DEL	Lenient	0.0808271
6735	chr1:128140688-128140902	214	DEL	Lenient	0.169811
6736	chr1:128225048-128225713	665	DEL	Stringent	0.0075188
6737	chr1:128263983-128264080	97	DEL	Lenient	0.808271
6738	chr1:128293407-128293461	54	DEL	Lenient	0.0037594
6739	chr1:128607194-128607444	250	DEL	Lenient	0.0714286
6740	chr1:128829493-128829591	98	DEL	Lenient	0.191729
6741	chr1:128853832-128856150	2318	DEL	Stringent	0.129699
6742	chr1:128888795-128888882	87	DEL	Lenient	0.550752
6743	chr1:129214122-129214642	520	DEL	Lenient	0.056391
6744	chr1:129314843-129315370	527	DEL	Lenient	0.0244361
6745	chr1:129371088-129379616	8528	DEL	Lenient	0.573308
6746	chr1:129403631-129403801	170	DEL	Lenient	0.266917
6747	chr1:129418741-129418881	140	DEL	Lenient	0.289474
6748	chr1:129525304-129525649	345	DEL	Lenient	0.620301
6749	chr1:129867452-129867657	205	DEL	Lenient	0.165414
6750	chr1:130045099-130045996	897	DEL	Stringent	0.434211
6751	chr1:130265494-130265545	51	DEL	Lenient	0.486842
6752	chr1:130268371-130268453	82	DEL	Lenient	0.281955
6753	chr1:131079287-131080571	1284	DEL	Stringent	0.404135
6754	chr1:131676389-131677711	1322	DEL	Lenient	0.0112782
6757	chr1:132004751-132006408	1657	DEL	Lenient	0.0169173
6758	chr1:132112187-132113495	1308	DEL	Stringent	0.0150376
6759	chr1:132264645-132266114	1469	DEL	Stringent	0.0225564
6762	chr1:133581560-133582873	1313	DEL	Stringent	0.0676692
6763	chr1:133834971-133836412	1441	DEL	Lenient	0.238722
6764	chr1:133852799-133858436	5637	DEL	Stringent	0.0432331
6766	chr1:133939196-133939587	391	DEL	Lenient	0.18985
6767	chr1:134116598-134117834	1236	DEL	Stringent	0.349624
6768	chr1:134387143-134387321	178	DEL	Lenient	0.409774
6769	chr1:134433867-134438060	4193	DEL	Stringent	0.257519
6772	chr1:135896731-135896916	185	DEL	Lenient	0.0225564
6774	chr1:136366283-136366334	51	DEL	Lenient	0.261278
6775	chr1:136533979-136536230	2251	DEL	Lenient	0.255639
6777	chr1:136696211-136696967	756	DEL	Stringent	0.137218		ENSBTAG00000049044
6778	chr1:137035825-137038518	2693	DEL	Stringent	0.0225564
6779	chr1:137064040-137064124	84	DEL	Lenient	0.526316
6780	chr1:137077620-137079530	1910	DEL	Stringent	0.475564
6781	chr1:137080406-137080467	61	DEL	Lenient	0.473684
6782	chr1:137087958-137088968	1010	DEL	Lenient	0.332707
6783	chr1:137117544-137118418	874	DEL	Lenient	0.206767
6784	chr1:137336513-137336917	404	DEL	Lenient	0.109023
6785	chr1:137404099-137404259	160	DEL	Lenient	0.389098
6786	chr1:137450195-137450491	296	DEL	Lenient	0.0864662
6787	chr1:137596003-137596588	585	DEL	Lenient	0.180451
6788	chr1:137709331-137717877	8546	DEL	Lenient	0.785714
6789	chr1:137776873-137777036	163	DEL	Lenient	0.409774
6790	chr1:137893031-137896278	3247	DEL	Stringent	0.0093985
6791	chr1:138132819-138133029	210	DEL	Lenient	0.558271
6792	chr1:138180208-138183044	2836	DEL	Lenient	0.0037594		ENSBTAG00000010448(CPNE4)
6793	chr1:138237980-138238479	499	DEL	Lenient	0.330827
6794	chr1:138283412-138283523	111	DEL	Lenient	0.195489
6795	chr1:138317726-138318965	1239	DEL	Lenient	0.868421
6796	chr1:138516933-138517626	693	DEL	Lenient	0.103383
6797	chr1:138653851-138654406	555	DEL	Stringent	0.0488722
6798	chr1:139063798-139064032	234	DEL	Lenient	0.255639
6799	chr1:139074735-139075165	430	DEL	Stringent	0.263158
6800	chr1:139102763-139103152	389	DEL	Lenient	0.859023
6801	chr1:139894050-139894767	717	DEL	Lenient	0.43985
6802	chr1:140119171-140120440	1269	DEL	Stringent	0.0281955
6803	chr1:140471808-140472031	223	DEL	Lenient	0.214286
6804	chr1:140519007-140521197	2190	DEL	Stringent	0.915414
6805	chr1:140598020-140598144	124	DEL	Lenient	0.253759
6806	chr1:140673574-140674274	700	DEL	Lenient	0.0996241
6807	chr1:140720712-140723846	3134	DEL	Stringent	0.056391
6808	chr1:140773444-140773717	273	DEL	Lenient	0.471804
6809	chr1:140800458-140800657	199	DEL	Lenient	0.31391
6811	chr1:140967683-140967757	74	DEL	Lenient	0.255639
6812	chr1:140974414-140974520	106	DEL	Lenient	0.261278
6813	chr1:141406504-141406641	137	DEL	Lenient	0.156015
6814	chr1:141556202-141556300	98	DEL	Lenient	0.719925
6815	chr1:141566340-141566615	275	DEL	Lenient	0.280075
6816	chr1:141566777-141566855	78	DEL	Lenient	0.261278
6817	chr1:141598596-141598787	191	DEL	Lenient	0.298872
6818	chr1:141782910-141783916	1006	DEL	Stringent	0.0037594
6822	chr1:142384049-142385611	1562	DEL	Lenient	0.0582707
6823	chr1:142396072-142396324	252	DEL	Lenient	0.0469925
6824	chr1:142579844-142580026	182	DEL	Lenient	0.464286
6828	chr1:143436673-143438339	1666	DEL	Lenient	0.298872
6829	chr1:143446723-143447453	730	DEL	Lenient	0.0657895
6831	chr1:143608336-143608400	64	DEL	Lenient	0.207547
6833	chr1:144001925-144001975	50	DEL	Lenient	0.056391
6835	chr1:144185676-144185752	76	DEL	Lenient	0.0921053
6836	chr1:144294920-144295018	98	DEL	Lenient	0.0695489
6840	chr1:145063283-145063601	318	DEL	Stringent	0.0018797
6841	chr1:145253212-145253272	60	DEL	Lenient	0.830769
6842	chr1:145399761-145400726	965	DEL	Stringent	0.642857
6845	chr1:146185962-146186272	310	DEL	Lenient	0.364662
6848	chr1:146777345-146777405	60	DEL	Lenient	0.0977444
6849	chr1:146905646-146908566	2920	DEL	Lenient	0.204887
6851	chr1:147444148-147444230	82	DEL	Stringent	0.994361
6852	chr1:147539158-147539234	76	DEL	Lenient	0.075188
6853	chr1:147638309-147638965	656	DEL	Lenient	0.454887
6854	chr1:147659535-147659681	146	DEL	Lenient	0.481203
6855	chr1:147676116-147677412	1296	DEL	Stringent	0.415414
6857	chr1:147696809-147697121	312	DEL	Lenient	0.0827068
6858	chr1:147862429-147862928	499	DEL	Lenient	0.289474
6859	chr1:147894861-147894982	121	DEL	Lenient	0.176692
6860	chr1:148064056-148072596	8540	DEL	Lenient	0.037594
6861	chr1:148121393-148121479	86	DEL	Stringent	0.0037594
6862	chr1:148241184-148241778	594	DEL	Stringent	0.037594
6864	chr1:148294070-148294164	94	DEL	Lenient	0.208647
6865	chr1:148373085-148379435	6350	DEL	Lenient	0.0319549
6868	chr1:149255159-149255236	77	DEL	Lenient	0.492453
6870	chr1:149590664-149591196	532	DEL	Stringent	0.0037594
6871	chr1:149607975-149609076	1101	DEL	Lenient	0.592105
6872	chr1:150721119-150721913	794	DEL	Lenient	0.0451128
6873	chr1:151206452-151206540	88	DEL	Lenient	0.212406
6875	chr1:151585985-151587864	1879	DEL	Stringent	0.101504
6877	chr1:151712049-151720984	8935	DEL	Lenient	0.843985
6878	chr1:152023904-152026022	2118	DEL	Stringent	0.165414
6880	chr1:152156081-152162168	6087	DEL	Lenient	0.18985
6881	chr1:152164412-152165336	924	DEL	Stringent	0.0620301
6882	chr1:152440464-152441354	890	DEL	Stringent	0.0075188
6883	chr1:152524020-152524483	463	DEL	Lenient	0.075188
6884	chr1:152569070-152573023	3953	DEL	Stringent	0.0921053
6885	chr1:153169491-153169560	69	DEL	Lenient	0.140977
6887	chr1:153289283-153289510	227	DEL	Lenient	0.219925
6888	chr1:153357794-153358243	449	DEL	Lenient	0.0639098
6889	chr1:153586478-153587012	534	DEL	Lenient	0.359023
6890	chr1:153878204-153878264	60	DEL	Lenient	0.0150376
6891	chr1:154007060-154007306	246	DEL	Lenient	0.233083
6893	chr1:154094317-154094391	74	DEL	Lenient	0.0075188
6894	chr1:154106282-154109109	2827	DEL	Lenient	0.588346
6895	chr1:154667933-154669269	1336	DEL	Stringent	0.093985
6896	chr1:154959834-154960128	294	DEL	Stringent	0.0037594
6897	chr1:155053815-155055501	1686	DEL	Stringent	0.120301
6898	chr1:155393102-155393251	149	DEL	Lenient	0.287594
6899	chr1:155806397-155811280	4883	DEL	Stringent	0.0037594
6901	chr1:155986753-155986860	107	DEL	Lenient	0.654135
6903	chr1:156122208-156124625	2417	DEL	Lenient	0.550752
6905	chr1:156126013-156126174	161	DEL	Lenient	0.25
6906	chr1:156184500-156185410	910	DEL	Lenient	0.528196
6910	chr1:156247373-156248328	955	DEL	Lenient	0.0921053
6911	chr1:156270160-156271709	1549	DEL	Lenient	0.120301
6912	chr1:156514429-156514588	159	DEL	Lenient	0.0357143
6914	chr1:156588957-156589567	610	DEL	Lenient	0.419173
6915	chr1:156688695-156689119	424	DEL	Lenient	0.834586
6917	chr1:157078542-157079046	504	DEL	Lenient	0.212406
6920	chr1:157277983-157278033	50	DEL	Lenient	0.298872
6924	chr1:157905819-157912249	6430	DEL	Stringent	0.484962
6925	chr1:158429179-158430771	1592	DEL	Stringent	0.0075188
6926	chr1:158492405-158492491	86	DEL	Lenient	0.0770677
6927	chr10:24177-24768	591	DEL	Lenient	0.0357143
6928	chr10:137387-137440	53	DEL	Lenient	0.0150376
6929	chr10:287895-288161	266	DEL	Lenient	0.342105
6930	chr10:290996-291056	60	DEL	Lenient	0.432331
6931	chr10:398991-400902	1911	DEL	Stringent	0.0225564
6932	chr10:658715-658766	51	DEL	Lenient	0.87594
6933	chr10:741254-741784	530	DEL	Lenient	0.315789
6934	chr10:948464-949515	1051	DEL	Stringent	0.0018797
6937	chr10:1145256-1146040	784	DEL	Stringent	0.0018797
6938	chr10:1409535-1410756	1221	DEL	Lenient	0.218045
6939	chr10:1650074-1652235	2161	DEL	Lenient	0.199248
6940	chr10:1787558-1787611	53	DEL	Lenient	0.0451128
6941	chr10:1943082-1946973	3891	DEL	Lenient	0.266917
6943	chr10:2134854-2135514	660	DEL	Lenient	0.0413534
6944	chr10:2151351-2151692	341	DEL	Lenient	0.400376
6945	chr10:2321436-2321864	428	DEL	Stringent	0.0150376
6946	chr10:2324455-2325124	669	DEL	Lenient	0.684211
6947	chr10:2555910-2558002	2092	DEL	Stringent	0.0319549
6949	chr10:2682900-2682995	95	DEL	Lenient	0.695489
6950	chr10:2683584-2684496	912	DEL	Lenient	0.281955
6951	chr10:2755857-2757100	1243	DEL	Stringent	0.644737
6952	chr10:2794679-2794731	52	DEL	Lenient	0.621622
6953	chr10:2915707-2918615	2908	DEL	Stringent	0.458647
6954	chr10:3227522-3227692	170	DEL	Lenient	0.152256
6955	chr10:3461415-3462898	1483	DEL	Lenient	0.575188
6956	chr10:3745772-3745865	93	DEL	Lenient	0.524436
6957	chr10:3822941-3825434	2493	DEL	Lenient	0.460526
6958	chr10:3919819-3919873	54	DEL	Lenient	0.193609
6960	chr10:4230815-4232239	1424	DEL	Stringent	0.0827068
6962	chr10:4324839-4326018	1179	DEL	Lenient	0.674812
6963	chr10:4400466-4400661	195	DEL	Lenient	0.114662
6964	chr10:4524420-4532993	8573	DEL	Stringent	0.167293
6965	chr10:4728832-4730808	1976	DEL	Stringent	0.0281955
6966	chr10:4742448-4742557	109	DEL	Stringent	0.0018797
6967	chr10:5171710-5171894	184	DEL	Lenient	0.323308
6968	chr10:5724322-5724573	251	DEL	Lenient	0.199248
6970	chr10:6142985-6143085	100	DEL	Lenient	0.590226
6971	chr10:6289113-6289171	58	DEL	Lenient	0.12594
6972	chr10:6383020-6383356	336	DEL	Lenient	0.796226
6974	chr10:6408144-6408304	160	DEL	Lenient	0.214286
6975	chr10:6415226-6415349	123	DEL	Lenient	0.0526316
6976	chr10:6619974-6620470	496	DEL	Stringent	0.994361
6977	chr10:6701965-6703258	1293	DEL	Lenient	0.146617
6978	chr10:7043322-7043372	50	DEL	Lenient	0.110902
6979	chr10:7076727-7079113	2386	DEL	Stringent	0.0263158
6980	chr10:7097220-7098270	1050	DEL	Stringent	0.601504
6984	chr10:7373426-7373836	410	DEL	Lenient	0.0357143
6985	chr10:7452285-7452926	641	DEL	Lenient	0.139098
6986	chr10:7782774-7782879	105	DEL	Lenient	0.612782
6987	chr10:7811437-7812044	607	DEL	Lenient	0.808271
6989	chr10:7841475-7842160	685	DEL	Stringent	0.223684
6990	chr10:8053600-8053785	185	DEL	Lenient	0.682331
6991	chr10:8066066-8066597	531	DEL	Lenient	0.298872
6992	chr10:8148305-8148384	79	DEL	Lenient	0.765038
6993	chr10:8158783-8159252	469	DEL	Stringent	0.25188
6994	chr10:8217776-8217998	222	DEL	Lenient	0.592105
6995	chr10:8268376-8268435	59	DEL	Lenient	0.159774
6996	chr10:8558220-8558366	146	DEL	Lenient	0.131679
6997	chr10:8682058-8682401	343	DEL	Lenient	0.543233
6998	chr10:8931811-8931970	159	DEL	Lenient	0.212406
7000	chr10:9183620-9184102	482	DEL	Lenient	0.283835
7001	chr10:9232980-9233489	509	DEL	Lenient	0.133459
7002	chr10:9262598-9262744	146	DEL	Stringent	0.176692
7003	chr10:9750329-9752134	1805	DEL	Stringent	0.883459
7004	chr10:9790932-9790992	60	DEL	Lenient	0.0469925
7005	chr10:10357866-10361863	3997	DEL	Lenient	0.0845865
7006	chr10:10531873-10532754	881	DEL	Stringent	0.924812
7007	chr10:10570611-10570699	88	DEL	Lenient	0.0601504
7010	chr10:11222064-11222142	78	DEL	Lenient	0.795113
7011	chr10:11492311-11492438	127	DEL	Lenient	0.503759
7012	chr10:11598942-11599281	339	DEL	Lenient	0.701128
7013	chr10:11631962-11632166	204	DEL	Lenient	0.885338
7014	chr10:11858222-11858299	77	DEL	Lenient	0.0112782
7016	chr10:12014192-12014537	345	DEL	Stringent	0.0281955
7017	chr10:12409726-12409782	56	DEL	Stringent	0.984962
7019	chr10:12823329-12823386	57	DEL	Lenient	0.68797
7020	chr10:12916244-12917788	1544	DEL	Stringent	0.225564
7021	chr10:13048755-13049451	696	DEL	Lenient	0.56015
7022	chr10:13181360-13185881	4521	DEL	Stringent	0.0225564
7023	chr10:13319274-13320727	1453	DEL	Stringent	0.0037594
7024	chr10:13347792-13347868	76	DEL	Stringent	0.0037594
7025	chr10:13429542-13430312	770	DEL	Lenient	0.347744
7026	chr10:13840795-13841274	479	DEL	Lenient	0.0432331
7027	chr10:14644061-14647578	3517	DEL	Lenient	0.114662
7028	chr10:14712257-14712324	67	DEL	Lenient	0.295113
7029	chr10:15078514-15078818	304	DEL	Stringent	0.0131579
7031	chr10:15787773-15788670	897	DEL	Stringent	0.678571
7032	chr10:15822327-15823532	1205	DEL	Lenient	0.693609
7033	chr10:16402004-16403688	1684	DEL	Lenient	0.0338346
7034	chr10:16682646-16688438	5792	DEL	Stringent	0.0281955
7035	chr10:17678711-17679160	449	DEL	Stringent	0.0150376
7036	chr10:17856530-17865055	8525	DEL	Lenient	0.646617
7039	chr10:18397960-18398230	270	DEL	Lenient	0.0620301
7040	chr10:18587096-18587403	307	DEL	Lenient	0.390977
7041	chr10:19261220-19261296	76	DEL	Lenient	0.900376
7042	chr10:19305347-19305432	85	DEL	Lenient	0.0281955
7043	chr10:20021814-20029463	7649	DEL	Stringent	0.219925
7044	chr10:20055587-20055910	323	DEL	Lenient	0.338346
7045	chr10:20130852-20130916	64	DEL	Lenient	0.0545113
7046	chr10:20144312-20144574	262	DEL	Lenient	0.323308
7047	chr10:20393122-20393275	153	DEL	Lenient	0.109023
7049	chr10:20463810-20464415	605	DEL	Lenient	0.0601504
7052	chr10:21397473-21397546	73	DEL	Lenient	0.701128
7054	chr10:22140985-22141142	157	DEL	Lenient	0.135338
7055	chr10:22184192-22184424	232	DEL	Lenient	0.225564
7057	chr10:22286501-22286569	68	DEL	Lenient	0.400376
7058	chr10:22418432-22419139	707	DEL	Lenient	0.43985
7065	chr10:22623794-22625320	1526	DEL	Stringent	0.332707
7077	chr10:22789223-22988036	198813	DEL	Lenient	0.0056391		ENSBTAG00000046819, ENSBTAG00000047690, ENSBTAG00000050391, ENSBTAG00000050781, ENSBTAG00000050913, ENSBTAG00000054091, ENSBTAG00000054417
7088	chr10:22852619-22853107	488	DEL	Lenient	0.381579
7090	chr10:22860910-23053500	192590	DEL	Lenient	0.0206767		ENSBTAG00000038544, ENSBTAG00000045863, ENSBTAG00000046819, ENSBTAG00000049260, ENSBTAG00000050781, ENSBTAG00000054091, ENSBTAG00000054130
7091	chr10:22864473-22865452	979	DEL	Lenient	0.466165
7093	chr10:22909220-22909315	95	DEL	Lenient	0.381132
7094	chr10:22975168-22976568	1400	DEL	Lenient	0.642857
7096	chr10:22976844-22977252	408	DEL	Lenient	0.520677
7097	chr10:22978147-22978350	203	DEL	Lenient	0.648496
7102	chr10:23265977-23266092	115	DEL	Lenient	0.037594
7105	chr10:23538729-23539022	293	DEL	Lenient	0.50188
7111	chr10:23599543-23614188	14645	DEL	Lenient	0.0093985		ENSBTAG00000048874
7112	chr10:23637211-23653320	16109	DEL	Lenient	0.110902
7118	chr10:24955112-24960551	5439	DEL	Lenient	0.112782
7120	chr10:24969889-24972737	2848	DEL	Lenient	0.107143
7127	chr10:25027228-25027840	612	DEL	Lenient	0.503759
7128	chr10:25069507-25075160	5653	DEL	Lenient	0.404135
7130	chr10:25178266-25181808	3542	DEL	Lenient	0.0169173
7132	chr10:25225250-25225968	718	DEL	Lenient	0.0958647
7133	chr10:25229611-25240804	11193	DEL	Stringent	0.0018797
7135	chr10:25259987-25260057	70	DEL	Lenient	0.50188
7150	chr10:25550491-25551164	673	DEL	Lenient	0.0075188
7151	chr10:25903275-25903367	92	DEL	Lenient	0.716165
7154	chr10:26109000-26110278	1278	DEL	Lenient	0.432331
7155	chr10:26238727-26238898	171	DEL	Lenient	0.740601
7157	chr10:26332520-26333079	559	DEL	Lenient	0.178571
7158	chr10:26416039-26416136	97	DEL	Lenient	0.847744
7159	chr10:26452134-26453034	900	DEL	Stringent	0.849624
7160	chr10:26576774-26578011	1237	DEL	Lenient	0.0733083
7163	chr10:26695197-26695676	479	DEL	Lenient	0.0902256
7165	chr10:26857276-26863530	6254	DEL	Lenient	0.0394737
7166	chr10:26866512-26866609	97	DEL	Lenient	0.466165
7167	chr10:26868814-26869469	655	DEL	Lenient	0.334586		ENSBTAG00000054963
7168	chr10:26877115-26877336	221	DEL	Lenient	0.660377
7169	chr10:26896744-26897024	280	DEL	Lenient	0.0507519
7171	chr10:26912944-26913936	992	DEL	Lenient	0.159774
7172	chr10:26916922-26917156	234	DEL	Lenient	0.0309735
7174	chr10:26934484-26934815	331	DEL	Lenient	0.120301
7175	chr10:26949823-26951503	1680	DEL	Stringent	0.0037594
7176	chr10:27002592-27003042	450	DEL	Lenient	0.340226
7177	chr10:27060388-27061350	962	DEL	Stringent	0.319549
7178	chr10:27062758-27066369	3611	DEL	Lenient	0.389098
7180	chr10:27069935-27070807	872	DEL	Lenient	0.319549		ENSBTAG00000049188
7185	chr10:27190384-27191545	1161	DEL	Lenient	0.0770677
7186	chr10:27194240-27195632	1392	DEL	Lenient	0.0131579
7187	chr10:27201829-27201944	115	DEL	Stringent	0.0131579
7188	chr10:27282700-27284068	1368	DEL	Stringent	0.522556
7189	chr10:27317173-27317303	130	DEL	Lenient	0.566038
7190	chr10:27322372-27322586	214	DEL	Stringent	0.582707
7191	chr10:27323388-27323590	202	DEL	Lenient	0.580827
7192	chr10:27323677-27323947	270	DEL	Lenient	0.582707
7193	chr10:27324122-27324330	208	DEL	Lenient	0.556818
7194	chr10:27327637-27330596	2959	DEL	Lenient	0.582707
7195	chr10:27343919-27352535	8616	DEL	Lenient	0.582707
7196	chr10:27385581-27385701	120	DEL	Lenient	0.830827
7197	chr10:27387583-27388560	977	DEL	Stringent	0.838346
7198	chr10:27474382-27475281	899	DEL	Stringent	0.460526
7199	chr10:27513272-27513511	239	DEL	Lenient	0.575188
7200	chr10:27518804-27518861	57	DEL	Lenient	0.575188
7201	chr10:27557126-27557652	526	DEL	Lenient	0.340226
7202	chr10:27576661-27601759	25098	DEL	Stringent	0.140977		ENSBTAG00000053927
7203	chr10:27624800-27625236	436	DEL	Lenient	0.12594
7205	chr10:27675704-27675847	143	DEL	Lenient	0.543233
7206	chr10:27688164-27688602	438	DEL	Lenient	0.133459
7207	chr10:27708341-27710561	2220	DEL	Stringent	0.133459
7208	chr10:27712981-27713398	417	DEL	Lenient	0.509399
7209	chr10:27770392-27770743	351	DEL	Lenient	0.12218
7210	chr10:27774870-27775658	788	DEL	Lenient	0.109023
7211	chr10:27777535-27778117	582	DEL	Lenient	0.12218
7212	chr10:27832521-27834295	1774	DEL	Stringent	0.862782
7213	chr10:27861218-27861359	141	DEL	Lenient	0.449248
7214	chr10:27875128-27877331	2203	DEL	Stringent	0.0620301	validated
7215	chr10:27880057-27881346	1289	DEL	Lenient	0.0620301
7216	chr10:27907153-27913869	6716	DEL	Lenient	0.135338
7217	chr10:27916898-27917487	589	DEL	Lenient	0.451128
7218	chr10:27933736-27935603	1867	DEL	Stringent	0.451128
7219	chr10:27942247-27943032	785	DEL	Lenient	0.451128
7220	chr10:28005156-28005350	194	DEL	Lenient	0.0037594
7221	chr10:28009363-28011348	1985	DEL	Lenient	0.426692
7222	chr10:28080373-28088068	7695	DEL	Lenient	0.129699		ENSBTAG00000051874
7223	chr10:28602327-28602513	186	DEL	Lenient	0.0770677
7224	chr10:28887036-28887293	257	DEL	Lenient	0.930451
7227	chr10:29453154-29453371	217	DEL	Lenient	0.306391
7228	chr10:29483941-29484856	915	DEL	Stringent	0.319549
7229	chr10:29581885-29581958	73	DEL	Lenient	0.554511
7230	chr10:29692947-29696631	3684	DEL	Stringent	0.411654
7231	chr10:29826748-29827833	1085	DEL	Stringent	0.951128
7232	chr10:29982183-29982410	227	DEL	Lenient	0.172932
7233	chr10:30333619-30334642	1023	DEL	Lenient	0.018797
7234	chr10:30509281-30510226	945	DEL	Stringent	0.0075188
7236	chr10:31003296-31003348	52	DEL	Lenient	0.0150376
7237	chr10:31231585-31231736	151	DEL	Lenient	0.0394737
7238	chr10:31721570-31722947	1377	DEL	Stringent	0.0244361	validated
7239	chr10:31748485-31749387	902	DEL	Stringent	0.0112782
7240	chr10:31886499-31888328	1829	DEL	Stringent	0.0150376
7241	chr10:31940774-31940980	206	DEL	Lenient	0.0150376
7242	chr10:31989976-31991419	1443	DEL	Stringent	0.0037594
7243	chr10:32200747-32204466	3719	DEL	Stringent	0.0056391
7244	chr10:32229774-32230285	511	DEL	Stringent	0.0451128
7245	chr10:32470615-32471398	783	DEL	Stringent	0.0037594	validated
7246	chr10:32832129-32832182	53	DEL	Lenient	0.114662
7247	chr10:32975011-32983286	8275	DEL	Stringent	0.567669
7248	chr10:33210875-33212133	1258	DEL	Lenient	0.387218
7249	chr10:33320972-33323907	2935	DEL	Lenient	0.280075
7251	chr10:34430241-34433735	3494	DEL	Stringent	0.0432331
7252	chr10:34459765-34460073	308	DEL	Lenient	0.43797
7253	chr10:34527358-34527644	286	DEL	Lenient	0.0921053
7254	chr10:34607724-34609075	1351	DEL	Lenient	0.293233
7256	chr10:34741017-34741257	240	DEL	Lenient	0.0037594
7257	chr10:36651403-36655515	4112	DEL	Stringent	0.176692
7258	chr10:36949286-36949768	482	DEL	Lenient	0.0733083
7259	chr10:37846362-37847544	1182	DEL	Lenient	0.503759
7260	chr10:37873815-37873879	64	DEL	Lenient	0.114662
7261	chr10:38020399-38020656	257	DEL	Lenient	0.0620301
7262	chr10:38491167-38492017	850	DEL	Stringent	0.928571
7265	chr10:38635376-38635464	88	DEL	Lenient	0.109023
7266	chr10:38726726-38729855	3129	DEL	Stringent	0.0018797	validated
7267	chr10:38766573-38773133	6560	DEL	Lenient	0.120301
7268	chr10:38780426-38783920	3494	DEL	Stringent	0.176692	validated
7269	chr10:38864677-38865260	583	DEL	Lenient	0.291353
7270	chr10:38865542-38865659	117	DEL	Lenient	0.234962
7271	chr10:39052697-39053105	408	DEL	Stringent	0.285714
7272	chr10:39239126-39239339	213	DEL	Lenient	0.18985
7274	chr10:39356094-39357002	908	DEL	Stringent	0.018797
7275	chr10:39591197-39591641	444	DEL	Lenient	0.644737
7276	chr10:39598671-39598724	53	DEL	Lenient	0.454887
7277	chr10:39730961-39731187	226	DEL	Lenient	0.0620301
7278	chr10:39735504-39740260	4756	DEL	Lenient	0.620301
7279	chr10:39819086-39820126	1040	DEL	Lenient	0.165414
7280	chr10:39959610-39961304	1694	DEL	Lenient	0.191729
7283	chr10:40010545-40010773	228	DEL	Stringent	0.0225564
7284	chr10:40083957-40086192	2235	DEL	Lenient	0.0112782
7285	chr10:40162924-40164215	1291	DEL	Lenient	0.0996241
7286	chr10:40222500-40222557	57	DEL	Lenient	0.174812
7287	chr10:40340357-40341555	1198	DEL	Lenient	0.0845865
7288	chr10:40349059-40349126	67	DEL	Lenient	0.526316
7289	chr10:40357116-40358621	1505	DEL	Stringent	0.520677
7290	chr10:40665034-40665117	83	DEL	Lenient	0.62782
7291	chr10:40836887-40837489	602	DEL	Lenient	0.0921053
7292	chr10:40869287-40873344	4057	DEL	Lenient	0.453008
7294	chr10:41034810-41035295	485	DEL	Lenient	0.201128
7295	chr10:41091179-41091338	159	DEL	Lenient	0.172932
7296	chr10:41345429-41345502	73	DEL	Lenient	0.296992
7297	chr10:41347262-41348176	914	DEL	Lenient	0.291353
7298	chr10:41484114-41484633	519	DEL	Lenient	0.289474
7299	chr10:41496586-41512933	16347	DEL	Stringent	0.336466
7300	chr10:41505155-41505685	530	DEL	Lenient	0.00641026
7301	chr10:41582103-41583278	1175	DEL	Stringent	0.238722
7302	chr10:41805493-41808255	2762	DEL	Stringent	0.996241
7303	chr10:42608617-42608679	62	DEL	Lenient	0.257519
7304	chr10:43055214-43055550	336	DEL	Lenient	0.325188
7306	chr10:43717578-43717995	417	DEL	Lenient	0.107143
7307	chr10:43724967-43725201	234	DEL	Lenient	0.383459
7308	chr10:43891036-43892131	1095	DEL	Stringent	0.018797	validated	ENSBTAG00000053552
7309	chr10:43976377-43978555	2178	DEL	Stringent	0.0093985
7310	chr10:44022321-44023725	1404	DEL	Lenient	0.973684
7311	chr10:44209771-44209984	213	DEL	Stringent	0.0018797
7312	chr10:44210538-44211518	980	DEL	Stringent	0.0018797
7313	chr10:44218578-44220481	1903	DEL	Stringent	0.99812
7314	chr10:44221558-44221625	67	DEL	Stringent	0.998113
7316	chr10:44604716-44605188	472	DEL	Lenient	0.5
7317	chr10:44623536-44623598	62	DEL	Lenient	0.712406
7318	chr10:44803226-44803314	88	DEL	Lenient	0.757519
7322	chr10:46008015-46008865	850	DEL	Stringent	0.0131579
7323	chr10:46190889-46191296	407	DEL	Stringent	0.0093985
7325	chr10:46525455-46526200	745	DEL	Lenient	0.56391
7326	chr10:46591979-46592042	63	DEL	Lenient	0.823755
7327	chr10:46633110-46633272	162	DEL	Lenient	0.191729
7328	chr10:46844249-46844315	66	DEL	Lenient	0.0357143
7329	chr10:47277977-47278086	109	DEL	Lenient	0.270677
7330	chr10:47323250-47323317	67	DEL	Lenient	0.109023
7331	chr10:47792233-47792598	365	DEL	Lenient	0.475564
7332	chr10:47986936-47987001	65	DEL	Lenient	0.0018797
7333	chr10:48143501-48143953	452	DEL	Lenient	0.191729
7334	chr10:48351214-48351280	66	DEL	Lenient	0.424812
7335	chr10:48802636-48804932	2296	DEL	Lenient	0.231203
7336	chr10:49539657-49540324	667	DEL	Stringent	0.116541
7337	chr10:49551511-49552340	829	DEL	Stringent	0.0112782
7338	chr10:50134501-50134608	107	DEL	Lenient	0.0733083
7340	chr10:50304556-50305058	502	DEL	Stringent	0.0526316
7341	chr10:50529529-50529715	186	DEL	Lenient	0.0225564
7342	chr10:50776303-50787947	11644	DEL	Stringent	0.0018797
7343	chr10:50781982-50782649	667	DEL	Lenient	0.0977444
7344	chr10:50785652-50786937	1285	DEL	Lenient	0.0488722
7345	chr10:50868304-50868452	148	DEL	Lenient	0.0075188
7346	chr10:51313166-51313252	86	DEL	Lenient	0.144737
7349	chr10:52752310-52752492	182	DEL	Lenient	0.413534
7350	chr10:52995205-52995282	77	DEL	Lenient	0.0509434
7351	chr10:53188733-53189036	303	DEL	Stringent	0.0338346
7352	chr10:53290779-53293972	3193	DEL	Lenient	0.332707
7354	chr10:54114670-54115166	496	DEL	Stringent	0.298872
7356	chr10:54398300-54399124	824	DEL	Stringent	0.0131579
7357	chr10:54412597-54412808	211	DEL	Lenient	0.109023
7359	chr10:55304358-55304445	87	DEL	Lenient	0.0112782
7360	chr10:55305282-55305742	460	DEL	Stringent	0.0112782
7362	chr10:55317621-55318543	922	DEL	Lenient	0.550752
7363	chr10:55378253-55379212	959	DEL	Stringent	0.0338346
7364	chr10:55508593-55517945	9352	DEL	Stringent	0.0281955
7366	chr10:55645637-55646762	1125	DEL	Stringent	0.0902256
7367	chr10:55689181-55690198	1017	DEL	Lenient	0.449248
7368	chr10:55838941-55840443	1502	DEL	Lenient	0.56015
7369	chr10:55877739-55878349	610	DEL	Lenient	0.766917
7370	chr10:55887771-55888318	547	DEL	Stringent	0.109023
7372	chr10:56030858-56031832	974	DEL	Stringent	0.242481
7374	chr10:56175890-56175972	82	DEL	Lenient	0.0244361
7375	chr10:56208006-56208094	88	DEL	Lenient	0.87782
7377	chr10:56379548-56380613	1065	DEL	Lenient	0.195489
7379	chr10:56801291-56801440	149	DEL	Lenient	0.272556
7380	chr10:56826385-56829084	2699	DEL	Stringent	0.0469925
7382	chr10:57184362-57185530	1168	DEL	Stringent	0.0093985
7383	chr10:57363920-57367266	3346	DEL	Stringent	0.0150376
7384	chr10:57390450-57391830	1380	DEL	Lenient	0.0244361
7385	chr10:57485064-57485857	793	DEL	Lenient	0.37594
7386	chr10:57862536-57863118	582	DEL	Lenient	0.120301
7387	chr10:58692205-58692326	121	DEL	Lenient	0.319549
7388	chr10:58864996-58865047	51	DEL	Lenient	0.0300752
7389	chr10:59159057-59160475	1418	DEL	Lenient	0.0225564
7390	chr10:59167113-59168430	1317	DEL	Lenient	0.0451128	validated
7393	chr10:59573328-59574101	773	DEL	Stringent	0.0075188
7394	chr10:59755653-59755948	295	DEL	Lenient	0.174812
7395	chr10:59826570-59827971	1401	DEL	Lenient	0.184211
7396	chr10:59947769-59953413	5644	DEL	Lenient	0.293233		ENSBTAG00000054826
7397	chr10:60005219-60005282	63	DEL	Lenient	0.0338346
7398	chr10:60517920-60518568	648	DEL	Stringent	0.454887
7399	chr10:60577523-60577700	177	DEL	Lenient	0.0507519
7401	chr10:60901032-60901086	54	DEL	Lenient	0.0526316
7402	chr10:61035354-61036595	1241	DEL	Lenient	0.265038
7403	chr10:62029506-62031254	1748	DEL	Stringent	0.0827068
7405	chr10:62196012-62196073	61	DEL	Lenient	0.0150376
7406	chr10:62228008-62228137	129	DEL	Stringent	0.0150376
7407	chr10:62470248-62475575	5327	DEL	Stringent	0.0620301
7408	chr10:62943629-62944573	944	DEL	Stringent	0.513158
7410	chr10:62979180-62979618	438	DEL	Lenient	0.37594
7411	chr10:63298371-63299454	1083	DEL	Stringent	0.037594
7412	chr10:63520475-63520599	124	DEL	Lenient	0.0244361
7413	chr10:63640661-63640927	266	DEL	Lenient	0.276316
7414	chr10:63703095-63705388	2293	DEL	Lenient	0.840226
7417	chr10:63948565-63950518	1953	DEL	Stringent	0.0507519
7418	chr10:64070218-64071403	1185	DEL	Stringent	0.0225564
7420	chr10:64310089-64310276	187	DEL	Lenient	0.109023
7421	chr10:64440603-64441510	907	DEL	Stringent	0.253759
7422	chr10:64443945-64444829	884	DEL	Lenient	0.477444
7423	chr10:64770071-64778759	8688	DEL	Lenient	0.588346
7424	chr10:65023712-65032147	8435	DEL	Lenient	0.68797		ENSBTAG00000050965
7425	chr10:65424433-65425463	1030	DEL	Stringent	0.114662	validated	ENSBTAG00000052848
7426	chr10:65458931-65459703	772	DEL	Stringent	0.114662
7428	chr10:65997644-65997740	96	DEL	Lenient	0.710526
7429	chr10:66117296-66118912	1616	DEL	Stringent	0.75188	validated
7430	chr10:66637855-66637913	58	DEL	Lenient	0.0075188
7431	chr10:66805098-66811189	6091	DEL	Stringent	0.490602
7432	chr10:66851395-66852517	1122	DEL	Stringent	0.0432331
7433	chr10:67023437-67023490	53	DEL	Lenient	0.0150376
7434	chr10:67361987-67362486	499	DEL	Stringent	0.0770677
7435	chr10:67401708-67402965	1257	DEL	Lenient	0.272556
7436	chr10:67634181-67634289	108	DEL	Lenient	0.140977
7437	chr10:68622423-68623487	1064	DEL	Stringent	0.0037594
7438	chr10:69209930-69210028	98	DEL	Lenient	0.146617
7439	chr10:69450053-69450133	80	DEL	Stringent	0.0056391
7440	chr10:69600221-69601918	1697	DEL	Stringent	0.0131579
7441	chr10:70249073-70249166	93	DEL	Lenient	0.31015
7444	chr10:70662056-70662130	74	DEL	Stringent	0.0037594
7446	chr10:71986051-71986393	342	DEL	Stringent	0.0244361
7447	chr10:74119421-74121032	1611	DEL	Stringent	0.225564
7450	chr10:74379791-74379847	56	DEL	Lenient	0.490602
7451	chr10:74467843-74468142	299	DEL	Lenient	0.274436
7452	chr10:74534238-74534537	299	DEL	Lenient	0.293233
7453	chr10:74559510-74559561	51	DEL	Lenient	0.361742
7454	chr10:74751675-74751948	273	DEL	Lenient	0.479323
7455	chr10:74994592-74994926	334	DEL	Stringent	0.0093985
7456	chr10:75619394-75619835	441	DEL	Stringent	0.0093985
7457	chr10:76420368-76420520	152	DEL	Lenient	0.921053
7458	chr10:76428784-76429312	528	DEL	Stringent	0.0018797
7459	chr10:76732139-76732952	813	DEL	Stringent	0.325188
7469	chr10:77282681-77283066	385	DEL	Stringent	0.0488722
7470	chr10:77290128-77311891	21763	DEL	Stringent	0.0413534
7471	chr10:77445346-77445436	90	DEL	Lenient	0.569549
7472	chr10:77493326-77493379	53	DEL	Lenient	0.0469925
7473	chr10:77746245-77749244	2999	DEL	Lenient	0.295113
7474	chr10:77847701-77847806	105	DEL	Lenient	0.360902
7475	chr10:77977229-77977329	100	DEL	Lenient	0.0432331
7476	chr10:78057372-78057638	266	DEL	Lenient	0.0789474
7477	chr10:78375884-78376002	118	DEL	Lenient	0.0056391
7503	chr10:79693107-79693183	76	DEL	Lenient	0.0789474
7505	chr10:80603969-80604439	470	DEL	Lenient	0.548872
7506	chr10:81161821-81163601	1780	DEL	Stringent	0.364662
7507	chr10:81180561-81180650	89	DEL	Lenient	0.479323
7508	chr10:81289792-81291647	1855	DEL	Stringent	0.0432331
7511	chr10:82749442-82749642	200	DEL	Lenient	0.706439
7512	chr10:83000939-83001034	95	DEL	Lenient	0.255639
7513	chr10:83078537-83078622	85	DEL	Lenient	0.421053
7514	chr10:83084981-83085179	198	DEL	Stringent	0.0037594
7515	chr10:83242412-83243052	640	DEL	Stringent	0.142857
7517	chr10:83376067-83377890	1823	DEL	Stringent	0.0075188
7518	chr10:83475642-83476094	452	DEL	Lenient	0.396617
7519	chr10:83925372-83925718	346	DEL	Lenient	0.0639098
7521	chr10:85015574-85016875	1301	DEL	Lenient	0.338346
7522	chr10:85033356-85034934	1578	DEL	Stringent	0.496241
7523	chr10:85086298-85086625	327	DEL	Lenient	0.306391
7524	chr10:85308298-85308500	202	DEL	Lenient	0.0093985
7525	chr10:86190806-86191715	909	DEL	Lenient	0.0545113
7529	chr10:86823830-86829615	5785	DEL	Lenient	0.68985
7530	chr10:86878211-86878482	271	DEL	Lenient	0.167293
7531	chr10:86890131-86890697	566	DEL	Lenient	0.336466
7532	chr10:86889950-86890314	364	DEL	Lenient	0.370722
7533	chr10:87178474-87179476	1002	DEL	Lenient	0.204887
7535	chr10:87416709-87417704	995	DEL	Stringent	0.87594
7538	chr10:87745722-87745795	73	DEL	Lenient	0.0770677
7539	chr10:88298457-88298509	52	DEL	Lenient	0.0208333
7541	chr10:89091153-89091325	172	DEL	Lenient	0.530075
7544	chr10:89448798-89449067	269	DEL	Lenient	0.496241
7545	chr10:89518537-89522621	4084	DEL	Stringent	0.109023
7546	chr10:89548873-89549238	365	DEL	Lenient	0.526316
7547	chr10:89572419-89572606	187	DEL	Lenient	0.105263
7548	chr10:89599903-89609092	9189	DEL	Stringent	0.0131579
7549	chr10:89721520-89721751	231	DEL	Lenient	0.0263158
7550	chr10:90142879-90143720	841	DEL	Stringent	0.0075188
7551	chr10:90244966-90245371	405	DEL	Lenient	0.109023
7552	chr10:90430522-90431264	742	DEL	Lenient	0.362782
7553	chr10:90435119-90435202	83	DEL	Stringent	0.0037594
7554	chr10:90476620-90477118	498	DEL	Lenient	0.317669
7555	chr10:90673378-90673745	367	DEL	Lenient	0.0827068
7556	chr10:90810539-90811403	864	DEL	Stringent	0.37782
7557	chr10:90939470-90939560	90	DEL	Lenient	0.0281955
7558	chr10:90988173-90988249	76	DEL	Lenient	0.616541
7559	chr10:91031691-91032015	324	DEL	Lenient	0.468045
7560	chr10:91481214-91481305	91	DEL	Lenient	0.259398
7561	chr10:91564628-91566293	1665	DEL	Stringent	0.037594
7562	chr10:91707870-91708095	225	DEL	Stringent	0.037594
7563	chr10:92159833-92159889	56	DEL	Lenient	0.0112782
7564	chr10:92463130-92463248	118	DEL	Lenient	0.432331
7565	chr10:93094851-93096173	1322	DEL	Stringent	0.0075188
7566	chr10:93172413-93172935	522	DEL	Lenient	0.156015
7567	chr10:93180023-93180359	336	DEL	Lenient	0.293233
7568	chr10:93313003-93315975	2972	DEL	Stringent	0.291353
7569	chr10:93364843-93366536	1693	DEL	Lenient	0.432331
7570	chr10:93754677-93755706	1029	DEL	Stringent	0.178571
7571	chr10:93772252-93772935	683	DEL	Lenient	0.332707
7572	chr10:93904143-93904248	105	DEL	Lenient	0.142857
7573	chr10:93938249-93939995	1746	DEL	Stringent	0.107143
7574	chr10:94195331-94196604	1273	DEL	Lenient	0.319549
7575	chr10:94232200-94233781	1581	DEL	Stringent	0.340226
7576	chr10:94251632-94251736	104	DEL	Lenient	0.120301
7577	chr10:94280264-94282609	2345	DEL	Stringent	0.0338346
7579	chr10:94556229-94556334	105	DEL	Lenient	0.548872
7580	chr10:94592312-94593024	712	DEL	Lenient	0.505639
7581	chr10:94746053-94746825	772	DEL	Lenient	0.139098
7582	chr10:94776357-94777497	1140	DEL	Stringent	0.996241
7583	chr10:94974513-94975321	808	DEL	Lenient	0.0432331
7584	chr10:95046683-95046845	162	DEL	Lenient	0.0319549
7585	chr10:95048920-95049608	688	DEL	Lenient	0.966165
7586	chr10:95146087-95146340	253	DEL	Lenient	0.0244361
7588	chr10:95273896-95273981	85	DEL	Lenient	0.118421
7589	chr10:95277133-95282808	5675	DEL	Lenient	0.0056391
7590	chr10:95465747-95465903	156	DEL	Lenient	0.770677
7591	chr10:95812766-95812868	102	DEL	Lenient	0.359023
7592	chr10:96264914-96265026	112	DEL	Lenient	0.325188
7593	chr10:97077488-97078027	539	DEL	Lenient	0.962406
7594	chr10:97133133-97134429	1296	DEL	Stringent	0.75
7596	chr10:97704040-97706610	2570	DEL	Stringent	0.037594
7597	chr10:97727554-97727657	103	DEL	Lenient	0.037594
7598	chr10:98122171-98122263	92	DEL	Lenient	0.43609
7599	chr10:98385829-98386703	874	DEL	Lenient	0.240602
7601	chr10:98430113-98430209	96	DEL	Lenient	0.157895
7602	chr10:98539382-98541540	2158	DEL	Stringent	0.103383
7603	chr10:98668075-98668257	182	DEL	Lenient	0.0676692
7604	chr10:98728195-98728268	73	DEL	Lenient	0.0770677
7605	chr10:98912172-98912232	60	DEL	Lenient	0.0733083
7606	chr10:98940667-98940929	262	DEL	Lenient	0.569549
7607	chr10:99047194-99047349	155	DEL	Lenient	0.0545113
7608	chr10:99083206-99084119	913	DEL	Stringent	0.0281955
7609	chr10:99134320-99134656	336	DEL	Lenient	0.652256
7610	chr10:99222804-99223261	457	DEL	Stringent	0.697368
7611	chr10:99268836-99269211	375	DEL	Lenient	0.0639098
7612	chr10:99281748-99281849	101	DEL	Lenient	0.0733083
7616	chr10:100093326-100094774	1448	DEL	Stringent	0.783835
7617	chr10:100163431-100165121	1690	DEL	Stringent	0.0018797
7618	chr10:100171954-100172489	535	DEL	Lenient	0.486842
7637	chr10:100984497-100984576	79	DEL	Lenient	0.392857
7640	chr10:101138071-101138254	183	DEL	Lenient	0.24812
7641	chr10:101143185-101143586	401	DEL	Lenient	0.195489
7642	chr10:101238404-101239189	785	DEL	Stringent	0.0037594
7643	chr10:101492690-101493068	378	DEL	Lenient	0.112782
7645	chr10:101846450-101846802	352	DEL	Lenient	0.197368
7649	chr10:102243906-102243968	62	DEL	Lenient	0.469811
7651	chr10:102249423-102249479	56	DEL	Lenient	0.148649
7652	chr10:102717040-102717196	156	DEL	Lenient	0.0112782
7653	chr10:102907707-102908832	1125	DEL	Stringent	0.394737
7654	chr10:103016998-103017067	69	DEL	Lenient	0.725564
7657	chr10:103190967-103191455	488	DEL	Stringent	0.0413534
7659	chr11:6816-7327	511	DEL	Lenient	0.0340909
7663	chr11:395250-396141	891	DEL	Lenient	0.0150376
7664	chr11:404283-404691	408	DEL	Lenient	0.0281955	validated
7665	chr11:614714-615773	1059	DEL	Lenient	0.484962
7666	chr11:757315-758690	1375	DEL	Lenient	0.0093985
7667	chr11:783808-784367	559	DEL	Lenient	0.120301
7669	chr11:1417900-1426149	8249	DEL	Stringent	0.678571
7670	chr11:1507768-1507914	146	DEL	Lenient	0.056391
7671	chr11:1554737-1555521	784	DEL	Lenient	0.355263
7673	chr11:1829913-1831289	1376	DEL	Lenient	0.0075188
7675	chr11:2008189-2008494	305	DEL	Lenient	0.566038
7676	chr11:2027878-2028099	221	DEL	Stringent	0.0037594
7679	chr11:2495363-2496878	1515	DEL	Stringent	0.0601504
7682	chr11:3004121-3004197	76	DEL	Lenient	0.87406
7683	chr11:3058381-3059342	961	DEL	Lenient	0.336466
7687	chr11:3630204-3630717	513	DEL	Stringent	0.0902256
7690	chr11:4032511-4036578	4067	DEL	Stringent	0.415414
7691	chr11:4347991-4348277	286	DEL	Lenient	0.672348
7692	chr11:4397311-4398913	1602	DEL	Stringent	0.018797
7695	chr11:4918971-4919512	541	DEL	Lenient	0.667293
7701	chr11:5217149-5217224	75	DEL	Lenient	0.357143
7704	chr11:5886966-5887285	319	DEL	Lenient	0.592105
7705	chr11:5960620-5963496	2876	DEL	Stringent	0.0037594
7706	chr11:6297706-6298838	1132	DEL	Stringent	0.0827068
7707	chr11:6337101-6337968	867	DEL	Lenient	0.468045
7708	chr11:6425043-6425444	401	DEL	Lenient	0.133459
7709	chr11:6513587-6514467	880	DEL	Stringent	0.785714
7710	chr11:6828820-6829319	499	DEL	Lenient	0.881579
7711	chr11:6908869-6909038	169	DEL	Lenient	0.31391
7713	chr11:7525102-7525612	510	DEL	Stringent	0.116541
7714	chr11:8223213-8224836	1623	DEL	Stringent	0.018797
7715	chr11:8428225-8429075	850	DEL	Lenient	0.332707
7717	chr11:9422172-9423167	995	DEL	Stringent	0.87406
7718	chr11:9610186-9620137	9951	DEL	Lenient	0.280075
7720	chr11:9928991-9929108	117	DEL	Lenient	0.454887
7721	chr11:10075517-10076131	614	DEL	Lenient	0.849624
7724	chr11:10375048-10375109	61	DEL	Lenient	0.473684
7746	chr11:10903607-10903669	62	DEL	Lenient	0.464286
7747	chr11:10915681-10916151	470	DEL	Stringent	0.25
7748	chr11:10916332-10916452	120	DEL	Lenient	0.253759
7749	chr11:10925337-10925518	181	DEL	Lenient	0.742481
7750	chr11:11106689-11106959	270	DEL	Lenient	0.133459
7752	chr11:11331853-11338146	6293	DEL	Stringent	0.0357143
7755	chr11:13095979-13096991	1012	DEL	Lenient	0.868421
7757	chr11:13314971-13315066	95	DEL	Lenient	0.281955
7758	chr11:13472642-13472713	71	DEL	Lenient	0.107143
7759	chr11:13589952-13590092	140	DEL	Stringent	0.864662
7760	chr11:14118257-14118570	313	DEL	Lenient	0.265038
7764	chr11:14465567-14466763	1196	DEL	Stringent	0.0206767
7765	chr11:14651814-14651930	116	DEL	Lenient	0.5
7766	chr11:14717187-14717690	503	DEL	Lenient	0.0169173
7767	chr11:14877164-14877228	64	DEL	Lenient	0.0958647
7768	chr11:14958033-14958801	768	DEL	Lenient	0.093985
7769	chr11:16376078-16376174	96	DEL	Lenient	0.018797
7770	chr11:16383508-16383615	107	DEL	Lenient	0.543233
7771	chr11:16453155-16458602	5447	DEL	Stringent	0.163534
7772	chr11:16472022-16477610	5588	DEL	Stringent	0.0206767
7773	chr11:16702162-16702311	149	DEL	Stringent	0.0075188
7774	chr11:17025294-17025539	245	DEL	Stringent	0.43985
7775	chr11:17029414-17030758	1344	DEL	Stringent	0.99812
7776	chr11:17223801-17223914	113	DEL	Lenient	0.201128
7777	chr11:17332901-17333167	266	DEL	Lenient	0.569549
7778	chr11:17461226-17461917	691	DEL	Lenient	0.492481
7780	chr11:17462892-17464021	1129	DEL	Lenient	0.571429
7781	chr11:17497167-17497569	402	DEL	Lenient	0.834586
7782	chr11:17670506-17670841	335	DEL	Stringent	0.0037594
7784	chr11:17759858-17759945	87	DEL	Lenient	0.640977
7785	chr11:17813823-17814300	477	DEL	Stringent	0.0056391
7786	chr11:18176560-18176803	243	DEL	Lenient	0.74812
7788	chr11:18369049-18369104	55	DEL	Lenient	0.744361
7789	chr11:18387464-18387549	85	DEL	Lenient	0.0244361
7790	chr11:19401561-19402882	1321	DEL	Lenient	0.56391
7791	chr11:19787681-19789782	2101	DEL	Stringent	0.0150376
7792	chr11:19863282-19863518	236	DEL	Lenient	0.475564
7793	chr11:20267869-20267923	54	DEL	Lenient	0.093985
7795	chr11:20880030-20880110	80	DEL	Lenient	0.652256
7796	chr11:20967353-20968640	1287	DEL	Lenient	0.0695489
7797	chr11:20994081-20994150	69	DEL	Lenient	0.0714286
7798	chr11:21069154-21070105	951	DEL	Stringent	0.0300752
7799	chr11:21426080-21426161	81	DEL	Stringent	0.0018797
7800	chr11:21484233-21485178	945	DEL	Stringent	0.0150376
7801	chr11:21888180-21889172	992	DEL	Stringent	0.0582707
7802	chr11:22050094-22050165	71	DEL	Lenient	0.18609
7803	chr11:22056482-22056533	51	DEL	Lenient	0.180451
7804	chr11:22254240-22254294	54	DEL	Lenient	0.860902
7805	chr11:22361726-22361864	138	DEL	Lenient	0.293233
7807	chr11:22751439-22751490	51	DEL	Lenient	0.0150376
7808	chr11:23110911-23110979	68	DEL	Lenient	0.272556
7809	chr11:23120277-23120750	473	DEL	Lenient	0.0864662
7810	chr11:23351671-23351724	53	DEL	Lenient	0.0733083
7811	chr11:23460328-23460618	290	DEL	Lenient	0.0357143
7812	chr11:23522000-23522170	170	DEL	Lenient	0.605263
7814	chr11:23859968-23860030	62	DEL	Lenient	0.554511
7815	chr11:23996901-23997901	1000	DEL	Lenient	0.815789
7817	chr11:24327116-24327179	63	DEL	Lenient	0.218045
7818	chr11:24355597-24360343	4746	DEL	Stringent	0.0018797
7819	chr11:24473176-24473373	197	DEL	Lenient	0.169173
7820	chr11:24490632-24491591	959	DEL	Lenient	0.148496
7824	chr11:25210945-25211088	143	DEL	Lenient	0.110902
7825	chr11:25261399-25261476	77	DEL	Lenient	0.0112782
7826	chr11:26069171-26070464	1293	DEL	Lenient	0.586466
7827	chr11:26311417-26316234	4817	DEL	Stringent	0.0150376
7828	chr11:27004231-27005009	778	DEL	Stringent	0.178571
7829	chr11:27518530-27519443	913	DEL	Lenient	0.447368
7830	chr11:27615998-27618573	2575	DEL	Stringent	0.0112782
7832	chr11:28723258-28723744	486	DEL	Lenient	0.468045
7834	chr11:29110647-29111876	1229	DEL	Stringent	0.0394737
7836	chr11:29273063-29273560	497	DEL	Lenient	0.210526
7837	chr11:29357232-29358098	866	DEL	Stringent	0.684211
7838	chr11:29380255-29380806	551	DEL	Stringent	0.0639098
7840	chr11:29768186-29768274	88	DEL	Lenient	0.12218
7841	chr11:29854511-29855640	1129	DEL	Lenient	0.592105
7843	chr11:30307393-30308355	962	DEL	Stringent	0.0056391
7844	chr11:30857091-30857528	437	DEL	Lenient	0.0921053
7845	chr11:30908522-30908602	80	DEL	Lenient	0.511278
7846	chr11:31113256-31114007	751	DEL	Stringent	0.0037594	validated	ENSBTAG00000027015
7847	chr11:31324640-31325227	587	DEL	Lenient	0.620301
7848	chr11:31400422-31402456	2034	DEL	Lenient	0.165414
7850	chr11:31817120-31817171	51	DEL	Lenient	0.110902
7851	chr11:31842054-31850639	8585	DEL	Lenient	0.537594
7852	chr11:31997490-31998473	983	DEL	Lenient	0.0770677
7853	chr11:32368390-32368554	164	DEL	Lenient	0.169173
7854	chr11:32398207-32398485	278	DEL	Stringent	0.0018797
7855	chr11:32546796-32547049	253	DEL	Lenient	0.584586
7856	chr11:32582754-32583799	1045	DEL	Stringent	0.87406
7857	chr11:32820715-32821001	286	DEL	Lenient	0.234962
7858	chr11:32924568-32924695	127	DEL	Lenient	0.270677
7859	chr11:32925183-32925530	347	DEL	Lenient	0.255639
7860	chr11:33039745-33039805	60	DEL	Lenient	0.338346
7861	chr11:33181546-33181876	330	DEL	Lenient	0.327068
7862	chr11:33275475-33275555	80	DEL	Lenient	0.340226
7863	chr11:33517287-33517351	64	DEL	Lenient	0.0676692
7864	chr11:33673100-33673608	508	DEL	Lenient	0.093985
7865	chr11:33926705-33933071	6366	DEL	Stringent	0.0244361
7866	chr11:33954604-33955359	755	DEL	Lenient	0.0169173
7867	chr11:33989854-33992247	2393	DEL	Stringent	0.0469925
7868	chr11:34008501-34008578	77	DEL	Lenient	0.263158
7869	chr11:34060044-34060151	107	DEL	Lenient	0.0244361
7870	chr11:34064453-34064531	78	DEL	Lenient	0.0714286
7871	chr11:34082227-34082962	735	DEL	Lenient	0.983083
7872	chr11:34118801-34121043	2242	DEL	Stringent	0.037594	validated
7873	chr11:34294098-34294209	111	DEL	Lenient	0.332707
7874	chr11:34335355-34336955	1600	DEL	Stringent	0.0075188
7875	chr11:34400254-34402520	2266	DEL	Stringent	0.661654
7876	chr11:34477546-34480093	2547	DEL	Stringent	0.0112782	validated
7877	chr11:34501230-34502045	815	DEL	Stringent	0.652256
7878	chr11:34602395-34602461	66	DEL	Lenient	0.206767
7879	chr11:34720685-34720862	177	DEL	Lenient	0.0244361
7881	chr11:35116231-35116486	255	DEL	Lenient	0.199248
7882	chr11:35258173-35258824	651	DEL	Lenient	0.25
7883	chr11:35472273-35472950	677	DEL	Lenient	0.659774
7884	chr11:35580467-35581356	889	DEL	Stringent	0.327068
7886	chr11:35608961-35611984	3023	DEL	Lenient	0.402256
7888	chr11:35685534-35686601	1067	DEL	Stringent	0.0075188
7889	chr11:35700045-35700636	591	DEL	Stringent	0.492481
7890	chr11:35760782-35763793	3011	DEL	Stringent	0.0451128
7891	chr11:36030998-36034470	3472	DEL	Stringent	0.639098
7892	chr11:36036778-36037917	1139	DEL	Lenient	0.639098
7893	chr11:36383847-36383920	73	DEL	Lenient	0.620301
7894	chr11:36445320-36456822	11502	DEL	Lenient	0.479323		ENSBTAG00000051601
7895	chr11:36496622-36497058	436	DEL	Stringent	0.0018797
7896	chr11:36978936-36979092	156	DEL	Lenient	0.0206767
7897	chr11:37039230-37039364	134	DEL	Lenient	0.584615
7898	chr11:37142773-37143693	920	DEL	Stringent	0.0037594
7899	chr11:37240251-37240396	145	DEL	Lenient	0.0338346
7900	chr11:37551286-37552892	1606	DEL	Lenient	0.783835
7902	chr11:37904575-37904895	320	DEL	Lenient	0.541353
7903	chr11:37952514-37952892	378	DEL	Lenient	0.913534
7904	chr11:38722597-38722688	91	DEL	Lenient	0.43985
7906	chr11:38747986-38748157	171	DEL	Lenient	0.25188
7907	chr11:38782633-38783100	467	DEL	Lenient	0.565789
7908	chr11:38999929-39000420	491	DEL	Lenient	0.56203
7909	chr11:39330968-39331474	506	DEL	Lenient	0.453008
7910	chr11:39338898-39339024	126	DEL	Lenient	0.701128
7912	chr11:39501347-39501433	86	DEL	Lenient	0.180451
7913	chr11:39701187-39701841	654	DEL	Stringent	0.740601
7914	chr11:39702733-39702936	203	DEL	Lenient	0.74812
7915	chr11:39750506-39751047	541	DEL	Stringent	0.131579
7916	chr11:39771099-39773603	2504	DEL	Stringent	0.0469925	validated
7917	chr11:40074090-40075017	927	DEL	Lenient	0.727444
7918	chr11:40668105-40670762	2657	DEL	Stringent	0.887218
7919	chr11:40680586-40681602	1016	DEL	Lenient	0.114662
7921	chr11:40942294-40943449	1155	DEL	Stringent	0.018797
7923	chr11:41280842-41280949	107	DEL	Lenient	0.0451128
7924	chr11:41300102-41306554	6452	DEL	Stringent	0.0451128
7925	chr11:41385803-41386703	900	DEL	Stringent	0.154135
7926	chr11:41390240-41390369	129	DEL	Stringent	0.0789474
7927	chr11:41466851-41467278	427	DEL	Lenient	0.842105
7929	chr11:42343737-42344648	911	DEL	Stringent	0.12218
7930	chr11:42359895-42361422	1527	DEL	Stringent	0.154135
7931	chr11:43597805-43598527	722	DEL	Lenient	0.362782
7932	chr11:43917438-43917645	207	DEL	Lenient	0.364662
7933	chr11:44193331-44193654	323	DEL	Lenient	0.129699
7934	chr11:44298678-44305157	6479	DEL	Stringent	0.0075188
7936	chr11:44346301-44348597	2296	DEL	Lenient	0.0413534
7938	chr11:44380274-44380351	77	DEL	Lenient	0.0864662
7942	chr11:45178076-45181388	3312	DEL	Lenient	0.753759
7943	chr11:45187768-45188397	629	DEL	Lenient	0.413534
7944	chr11:45304233-45306748	2515	DEL	Stringent	0.0921053
7945	chr11:45918009-45918742	733	DEL	Lenient	0.0770677
7952	chr11:46666279-46666346	67	DEL	Lenient	0.18985
7954	chr11:47163542-47165822	2280	DEL	Lenient	0.582707
7959	chr11:47182354-47218292	35938	DEL	Lenient	0.0018797		ENSBTAG00000050329, ENSBTAG00000051611
7965	chr11:47226779-47240723	13944	DEL	Lenient	0.0263158		ENSBTAG00000003408, ENSBTAG00000051342
7968	chr11:47534012-47534125	113	DEL	Lenient	0.569811
7969	chr11:47566473-47566841	368	DEL	Lenient	0.453008
7971	chr11:47839820-47842364	2544	DEL	Stringent	0.0037594	validated
7972	chr11:48473886-48474763	877	DEL	Lenient	0.0131579
7973	chr11:48855802-48856358	556	DEL	Stringent	0.037594
7974	chr11:49178090-49245743	67653	DEL	Lenient	0.0056391		ENSBTAG00000039981, ENSBTAG00000047449, ENSBTAG00000047816
7978	chr11:49297670-49298963	1293	DEL	Stringent	0.0093985
7979	chr11:49785781-49788390	2609	DEL	Stringent	0.0451128
7980	chr11:49921637-49922821	1184	DEL	Lenient	0.0394737		ENSBTAG00000031731(HIGD1A)
7981	chr11:50158155-50158222	67	DEL	Lenient	0.12782
7983	chr11:50205814-50206386	572	DEL	Lenient	0.776316
7985	chr11:50236902-50237437	535	DEL	Lenient	0.757519
7986	chr11:50236637-50237480	843	DEL	Lenient	0.469925
7987	chr11:50375796-50376358	562	DEL	Lenient	0.172932
7989	chr11:50388432-50389121	689	DEL	Lenient	0.221805
7990	chr11:50428696-50428862	166	DEL	Lenient	0.906015
7991	chr11:50576999-50577055	56	DEL	Lenient	0.466165
7992	chr11:50613936-50614839	903	DEL	Lenient	0.441729
7993	chr11:50649022-50649516	494	DEL	Stringent	0.0244361
7994	chr11:50661964-50663062	1098	DEL	Stringent	0.522556
7995	chr11:51050612-51051681	1069	DEL	Stringent	0.287594
7996	chr11:51173772-51174127	355	DEL	Lenient	0.25188
7998	chr11:51369271-51369363	92	DEL	Lenient	0.146617
7999	chr11:51416608-51416859	251	DEL	Lenient	0.93797
8000	chr11:51488482-51489867	1385	DEL	Lenient	0.24812
8001	chr11:51569665-51571182	1517	DEL	Lenient	0.0827068
8002	chr11:51571673-51573531	1858	DEL	Stringent	0.477444
8005	chr11:51997890-51999881	1991	DEL	Stringent	0.430451
8006	chr11:52205561-52206572	1011	DEL	Lenient	0.567669
8007	chr11:52227671-52229913	2242	DEL	Stringent	0.0037594
8008	chr11:52451975-52452049	74	DEL	Lenient	0.093985
8010	chr11:52595698-52595924	226	DEL	Lenient	0.056391
8011	chr11:52596983-52601552	4569	DEL	Stringent	0.203008
8012	chr11:52611993-52612859	866	DEL	Stringent	0.0357143
8013	chr11:52627241-52627327	86	DEL	Lenient	0.056391
8014	chr11:52854495-52955650	101155	DEL	Stringent	0.0018797
8016	chr11:52968251-52969612	1361	DEL	Lenient	0.146617
8017	chr11:53104391-53105818	1427	DEL	Lenient	0.0469925
8019	chr11:53139688-53140893	1205	DEL	Lenient	0.469925
8020	chr11:53146275-53147200	925	DEL	Lenient	0.0150376
8021	chr11:53150426-53152386	1960	DEL	Stringent	0.018797
8022	chr11:53251304-53251396	92	DEL	Lenient	0.511278
8024	chr11:53341923-53342382	459	DEL	Lenient	0.018797
8025	chr11:53438400-53438595	195	DEL	Lenient	0.0469925
8027	chr11:53907214-53913383	6169	DEL	Lenient	0.0075188
8028	chr11:54033239-54033782	543	DEL	Lenient	0.12406
8029	chr11:54099887-54100209	322	DEL	Lenient	0.270677
8030	chr11:54159911-54160635	724	DEL	Lenient	0.0507519
8031	chr11:54339244-54342381	3137	DEL	Lenient	0.614662
8032	chr11:54382914-54383904	990	DEL	Stringent	0.0902256
8033	chr11:54402763-54403634	871	DEL	Stringent	0.0169173
8034	chr11:54527640-54529833	2193	DEL	Lenient	0.018797
8035	chr11:54543452-54543833	381	DEL	Lenient	0.492481
8036	chr11:54710132-54710663	531	DEL	Stringent	0.0357143
8037	chr11:54716667-54717052	385	DEL	Lenient	0.0357143
8038	chr11:55210340-55211044	704	DEL	Stringent	0.0093985
8041	chr11:55545192-55545507	315	DEL	Lenient	0.445489
8042	chr11:55711652-55712210	558	DEL	Stringent	0.0093985
8043	chr11:55755048-55755145	97	DEL	Lenient	0.370301
8044	chr11:55913832-55914602	770	DEL	Lenient	0.0808271
8045	chr11:55997741-55997836	95	DEL	Lenient	0.867925
8046	chr11:56064592-56064738	146	DEL	Lenient	0.353383
8047	chr11:56189485-56190023	538	DEL	Lenient	0.191729
8048	chr11:56405886-56405971	85	DEL	Lenient	0.0056391
8049	chr11:56471755-56471849	94	DEL	Lenient	0.336466
8050	chr11:56622623-56627632	5009	DEL	Stringent	0.0131579
8051	chr11:56678809-56679299	490	DEL	Stringent	0.0432331
8052	chr11:56751308-56753009	1701	DEL	Stringent	0.0413534
8053	chr11:56828482-56829165	683	DEL	Stringent	0.109023
8054	chr11:56885755-56885999	244	DEL	Lenient	0.0883459
8055	chr11:56968412-56968976	564	DEL	Stringent	0.103383
8056	chr11:56980471-56980828	357	DEL	Lenient	0.101504
8057	chr11:57035909-57038469	2560	DEL	Stringent	0.129699
8058	chr11:57048357-57049642	1285	DEL	Lenient	0.129699
8059	chr11:57056631-57058569	1938	DEL	Lenient	0.129699
8061	chr11:57154853-57155672	819	DEL	Lenient	0.370301
8062	chr11:57157060-57157218	158	DEL	Lenient	0.0206767
8063	chr11:57310443-57310767	324	DEL	Lenient	0.0958647
8064	chr11:57544660-57546868	2208	DEL	Stringent	0.0056391
8066	chr11:57575042-57575156	114	DEL	Stringent	0.827068
8067	chr11:57609520-57612058	2538	DEL	Stringent	0.586466
8068	chr11:57814553-57816508	1955	DEL	Stringent	0.0883459
8069	chr11:57881029-57888248	7219	DEL	Stringent	0.0545113	validated
8070	chr11:58281714-58282702	988	DEL	Lenient	0.161654
8073	chr11:58593725-58594015	290	DEL	Lenient	0.291353
8074	chr11:58753668-58759404	5736	DEL	Stringent	0.12218
8076	chr11:59056150-59056552	402	DEL	Stringent	0.161654
8077	chr11:59110813-59111100	287	DEL	Lenient	0.157895
8078	chr11:59119223-59120752	1529	DEL	Stringent	0.110902
8079	chr11:59174519-59174862	343	DEL	Lenient	0.0883459
8080	chr11:59249555-59250548	993	DEL	Lenient	0.0657895
8081	chr11:59252732-59254806	2074	DEL	Lenient	0.206767
8083	chr11:59461230-59461339	109	DEL	Lenient	0.567669
8085	chr11:59568732-59570502	1770	DEL	Lenient	0.107143
8086	chr11:59585698-59585753	55	DEL	Stringent	0.973684
8087	chr11:60032572-60032642	70	DEL	Lenient	0.120301
8095	chr11:60459280-60460406	1126	DEL	Stringent	0.261278
8097	chr11:60793060-60793124	64	DEL	Lenient	0.657895
8098	chr11:61001828-61001898	70	DEL	Lenient	0.0469925
8099	chr11:61274780-61274853	73	DEL	Lenient	0.0676692
8100	chr11:61389870-61394243	4373	DEL	Stringent	0.114662
8101	chr11:62051207-62053034	1827	DEL	Lenient	0.330827
8102	chr11:62094353-62094511	158	DEL	Lenient	0.479323
8103	chr11:62197813-62199041	1228	DEL	Lenient	0.148496
8104	chr11:62210281-62211630	1349	DEL	Lenient	0.178571
8106	chr11:62545185-62545733	548	DEL	Stringent	0.56015
8107	chr11:62854253-62854346	93	DEL	Lenient	0.941729
8108	chr11:62918915-62919590	675	DEL	Lenient	0.0488722
8109	chr11:63847792-63848026	234	DEL	Lenient	0.445489
8110	chr11:64176548-64176640	92	DEL	Lenient	0.0150376
8111	chr11:64262065-64262242	177	DEL	Lenient	0.0300752
8112	chr11:64270124-64271109	985	DEL	Stringent	0.0056391
8113	chr11:65284114-65285121	1007	DEL	Stringent	0.0018797
8114	chr11:65522371-65522457	86	DEL	Lenient	0.129699
8117	chr11:66089167-66089922	755	DEL	Stringent	0.62594
8118	chr11:66142110-66142665	555	DEL	Lenient	0.291353
8120	chr11:66510928-66512136	1208	DEL	Stringent	0.137218
8121	chr11:66710738-66711334	596	DEL	Stringent	0.0225564
8122	chr11:66930996-66932664	1668	DEL	Stringent	0.368421
8123	chr11:67240524-67242738	2214	DEL	Lenient	0.0733083
8124	chr11:67674249-67674345	96	DEL	Lenient	0.150376
8125	chr11:68624517-68624650	133	DEL	Lenient	0.0526316
8126	chr11:68649080-68651130	2050	DEL	Stringent	0.178571
8127	chr11:68838325-68838401	76	DEL	Lenient	0.197368
8128	chr11:69083667-69086240	2573	DEL	Lenient	0.0244361
8129	chr11:69277414-69278478	1064	DEL	Stringent	0.791353
8130	chr11:69377813-69403655	25842	DEL	Stringent	0.195489	validated
8131	chr11:69405906-69411150	5244	DEL	Stringent	0.355263	validated
8132	chr11:69616786-69616896	110	DEL	Lenient	0.0112782
8133	chr11:69902390-69902486	96	DEL	Lenient	0.0206767
8134	chr11:70151987-70152132	145	DEL	Lenient	0.753759
8135	chr11:70419780-70419831	51	DEL	Lenient	0.0413534
8136	chr11:70506523-70506997	474	DEL	Stringent	0.0733083
8137	chr11:70545050-70545104	54	DEL	Lenient	0.12594
8138	chr11:70758629-70759535	906	DEL	Lenient	0.233083
8139	chr11:70777740-70780016	2276	DEL	Stringent	0.037594
8142	chr11:72717542-72717713	171	DEL	Lenient	0.0432331
8143	chr11:72812981-72813603	622	DEL	Stringent	0.659774
8144	chr11:73782404-73783692	1288	DEL	Stringent	0.105263
8145	chr11:73839660-73840966	1306	DEL	Stringent	0.0545113
8146	chr11:74112893-74113099	206	DEL	Lenient	0.037594
8147	chr11:74764365-74764424	59	DEL	Lenient	0.219925
8148	chr11:74803656-74803811	155	DEL	Lenient	0.227444		ENSBTAG00000036858(U3)
8149	chr11:74833924-74833974	50	DEL	Lenient	0.0056391
8151	chr11:75247007-75247699	692	DEL	Stringent	0.31015
8152	chr11:75253840-75254538	698	DEL	Lenient	0.31015
8153	chr11:75416553-75416636	83	DEL	Lenient	0.24812
8154	chr11:75522107-75522919	812	DEL	Stringent	0.0394737
8155	chr11:75633729-75635042	1313	DEL	Stringent	0.0676692
8156	chr11:75728848-75729372	524	DEL	Lenient	0.204887
8157	chr11:76401632-76403098	1466	DEL	Stringent	0.977444
8159	chr11:76820703-76821824	1121	DEL	Stringent	0.0526316
8160	chr11:76852147-76852274	127	DEL	Lenient	0.524436
8161	chr11:76879402-76881549	2147	DEL	Lenient	0.0676692
8162	chr11:76889607-76891871	2264	DEL	Stringent	0.0169173
8163	chr11:77452288-77452368	80	DEL	Lenient	0.0281955
8165	chr11:78415132-78417109	1977	DEL	Stringent	0.0977444
8166	chr11:78819207-78825385	6178	DEL	Stringent	0.135338
8167	chr11:79424111-79424700	589	DEL	Lenient	0.447368
8169	chr11:80274227-80274324	97	DEL	Lenient	0.112782
8171	chr11:80382197-80382648	451	DEL	Lenient	0.368421
8173	chr11:81236753-81237139	386	DEL	Stringent	0.0112782
8174	chr11:81240348-81241565	1217	DEL	Stringent	0.0037594
8175	chr11:81486638-81487525	887	DEL	Lenient	0.524436
8176	chr11:81689030-81689430	400	DEL	Lenient	0.139098
8177	chr11:81759682-81762148	2466	DEL	Lenient	0.101504
8178	chr11:82262439-82263378	939	DEL	Lenient	0.454887
8179	chr11:82424171-82425404	1233	DEL	Stringent	0.182331
8181	chr11:82797399-82799047	1648	DEL	Stringent	0.379699
8182	chr11:82907965-82916512	8547	DEL	Lenient	0.545113
8184	chr11:83560086-83560145	59	DEL	Lenient	0.386792
8185	chr11:84087673-84091750	4077	DEL	Lenient	0.37406		ENSBTAG00000019284
8186	chr11:84449337-84451479	2142	DEL	Stringent	0.0357143
8187	chr11:84542793-84543602	809	DEL	Stringent	0.413534
8188	chr11:84711238-84712332	1094	DEL	Lenient	0.629699
8189	chr11:84805527-84811014	5487	DEL	Lenient	0.0150376
8190	chr11:84987220-84987623	403	DEL	Lenient	0.268797
8191	chr11:84998714-84999471	757	DEL	Lenient	0.195489
8192	chr11:85093677-85094398	721	DEL	Stringent	0.278196
8194	chr11:85176105-85176176	71	DEL	Lenient	0.0093985
8195	chr11:85562742-85563505	763	DEL	Stringent	0.0789474
8196	chr11:85599072-85600748	1676	DEL	Stringent	0.0225564
8197	chr11:85763274-85766901	3627	DEL	Stringent	0.471804
8198	chr11:85918858-85918990	132	DEL	Lenient	0.866541
8199	chr11:86113119-86113280	161	DEL	Lenient	0.0018797		ENSBTAG00000007689(LPIN1)
8200	chr11:86258670-86258725	55	DEL	Lenient	0.146388
8202	chr11:86397607-86397668	61	DEL	Lenient	0.578947
8203	chr11:86861634-86861707	73	DEL	Lenient	0.0357143
8204	chr11:87207092-87207606	514	DEL	Lenient	0.359023
8205	chr11:87456607-87457432	825	DEL	Stringent	0.0639098
8206	chr11:88442824-88445474	2650	DEL	Stringent	0.0075188
8208	chr11:88964317-88964398	81	DEL	Lenient	0.129699
8209	chr11:89012254-89012361	107	DEL	Lenient	0.5
8210	chr11:89289428-89289641	213	DEL	Lenient	0.0545113
8211	chr11:89665887-89666889	1002	DEL	Lenient	0.0770677
8212	chr11:89711026-89712010	984	DEL	Lenient	0.274436
8213	chr11:89844098-89844860	762	DEL	Lenient	0.411654
8214	chr11:90121109-90121166	57	DEL	Lenient	0.165414
8215	chr11:90285999-90286576	577	DEL	Lenient	0.257519
8216	chr11:90355630-90356431	801	DEL	Lenient	0.362782
8218	chr11:90392702-90392917	215	DEL	Lenient	0.573308
8219	chr11:90795300-90795824	524	DEL	Lenient	0.233083
8220	chr11:90840242-90840883	641	DEL	Lenient	0.0545113
8221	chr11:91287349-91288399	1050	DEL	Lenient	0.295113
8222	chr11:91685711-91685880	169	DEL	Lenient	0.0921053
8223	chr11:91833150-91833803	653	DEL	Lenient	0.300752
8224	chr11:91889791-91889894	103	DEL	Lenient	0.603383
8226	chr11:91967767-91967849	82	DEL	Lenient	0.295113
8227	chr11:92724962-92726623	1661	DEL	Lenient	0.360902
8228	chr11:92767614-92768379	765	DEL	Lenient	0.139098
8229	chr11:93093837-93094482	645	DEL	Lenient	0.817669
8231	chr11:93566594-93567161	567	DEL	Lenient	0.142857
8232	chr11:93583953-93584238	285	DEL	Lenient	0.0488722
8233	chr11:93589681-93590830	1149	DEL	Lenient	0.278196
8234	chr11:93591161-93591216	55	DEL	Lenient	0.0469925
8235	chr11:93607942-93608397	455	DEL	Lenient	0.509399
8236	chr11:93624994-93626244	1250	DEL	Lenient	0.075188
8237	chr11:93734550-93734601	51	DEL	Lenient	0.409774
8239	chr11:93805287-93805547	260	DEL	Lenient	0.577068
8240	chr11:93831998-93832110	112	DEL	Lenient	0.182331
8241	chr11:93832285-93843043	10758	DEL	Stringent	0.18985		ENSBTAG00000050629
8244	chr11:93902286-93902519	233	DEL	Lenient	0.0507519
8245	chr11:93903321-93903444	123	DEL	Lenient	0.0432331
8247	chr11:94624319-94624431	112	DEL	Lenient	0.0037594
8248	chr11:96096463-96097518	1055	DEL	Stringent	0.0018797
8250	chr11:96233178-96233235	57	DEL	Lenient	0.43609
8251	chr11:96426189-96426926	737	DEL	Lenient	0.169173
8252	chr11:97032163-97035347	3184	DEL	Lenient	0.0770677
8253	chr11:98392318-98392408	90	DEL	Lenient	0.5
8254	chr11:98677633-98677709	76	DEL	Lenient	0.362782
8259	chr11:99950562-99951533	971	DEL	Stringent	0.75
8260	chr11:99952172-99952706	534	DEL	Lenient	0.75
8275	chr11:101198281-101198332	51	DEL	Lenient	0.0432331
8277	chr11:101203309-101204195	886	DEL	Lenient	0.366541
8278	chr11:101734121-101734593	472	DEL	Lenient	0.0789474
8280	chr11:101971778-101972032	254	DEL	Lenient	0.0169173
8281	chr11:102144388-102145607	1219	DEL	Stringent	0.0018797
8283	chr11:102440544-102440988	444	DEL	Lenient	0.704887
8285	chr11:102503674-102504265	591	DEL	Lenient	0.360902
8287	chr11:102710634-102711176	542	DEL	Stringent	0.0263158
8288	chr11:103774821-103775277	456	DEL	Lenient	0.546992
8298	chr11:104181328-104181953	625	DEL	Stringent	0.840226
8299	chr11:104210413-104211194	781	DEL	Stringent	0.0075188
8300	chr11:104236303-104236528	225	DEL	Lenient	0.55144
8301	chr11:104236350-104237322	972	DEL	Stringent	0.0093985
8302	chr11:104443346-104443408	62	DEL	Lenient	0.464286
8304	chr11:104545217-104545291	74	DEL	Lenient	0.120301
8305	chr11:104789312-104790601	1289	DEL	Lenient	0.336466
8306	chr11:105531103-105531320	217	DEL	Lenient	0.488722
8308	chr11:105829306-105830124	818	DEL	Stringent	0.0037594
8309	chr11:106021226-106021276	50	DEL	Lenient	0.28937
8310	chr11:106178461-106180002	1541	DEL	Lenient	0.105263
8315	chr12:15103-15612	509	DEL	Lenient	0.328947
8316	chr12:16658-20465	3807	DEL	Lenient	0.575
8318	chr12:46618-86619	40001	DEL	Lenient	0.351504
8321	chr12:57976-58880	904	DEL	Lenient	0.0807692
8323	chr12:76187-77746	1559	DEL	Lenient	0.0601504
8325	chr12:87203-99115	11912	DEL	Stringent	0.0093985
8326	chr12:518722-518797	75	DEL	Lenient	0.357143
8327	chr12:522643-523380	737	DEL	Stringent	0.0338346
8328	chr12:542803-542878	75	DEL	Lenient	0.351504
8329	chr12:550647-550722	75	DEL	Lenient	0.0281955
8330	chr12:621645-622159	514	DEL	Lenient	0.953008
8331	chr12:646245-646315	70	DEL	Lenient	0.0526316
8332	chr12:723268-723558	290	DEL	Lenient	0.0582707
8335	chr12:755840-756320	480	DEL	Stringent	0.268797
8337	chr12:867509-867622	113	DEL	Lenient	0.0169173
8338	chr12:921112-924811	3699	DEL	Stringent	0.216165
8339	chr12:996669-997418	749	DEL	Lenient	0.678571
8340	chr12:1000297-1011004	10707	DEL	Stringent	0.37782
8341	chr12:1048284-1049077	793	DEL	Stringent	0.0169173
8342	chr12:1093725-1099049	5324	DEL	Lenient	0.406015
8343	chr12:1228780-1229072	292	DEL	Lenient	0.105263
8344	chr12:1237910-1240401	2491	DEL	Stringent	0.325188
8345	chr12:1299105-1300520	1415	DEL	Lenient	0.633459
8346	chr12:1304392-1304615	223	DEL	Lenient	0.364662
8347	chr12:1417796-1418292	496	DEL	Lenient	0.276316
8349	chr12:1461389-1463563	2174	DEL	Stringent	0.0451128	validated
8350	chr12:1473401-1474372	971	DEL	Lenient	0.774436
8351	chr12:1538464-1540957	2493	DEL	Lenient	0.101504
8352	chr12:1543969-1544106	137	DEL	Lenient	0.317669
8353	chr12:1632491-1632974	483	DEL	Lenient	0.204887
8354	chr12:1724297-1727081	2784	DEL	Lenient	0.340226
8355	chr12:1843273-1844565	1292	DEL	Lenient	0.221805
8356	chr12:1893282-1898489	5207	DEL	Lenient	0.0018797
8357	chr12:1896965-1897534	569	DEL	Lenient	0.245098
8358	chr12:1912971-1913358	387	DEL	Lenient	0.843985
8359	chr12:1947397-1949283	1886	DEL	Lenient	0.219925
8360	chr12:2036779-2036884	105	DEL	Lenient	0.283835
8362	chr12:2064100-2065256	1156	DEL	Stringent	0.657895
8366	chr12:2153824-2155297	1473	DEL	Lenient	0.0977444
8367	chr12:2476353-2477606	1253	DEL	Lenient	0.219925
8368	chr12:2588126-2588183	57	DEL	Lenient	0.0075188
8370	chr12:2897121-2897326	205	DEL	Lenient	0.618421
8373	chr12:3133755-3136414	2659	DEL	Stringent	0.616541
8377	chr12:3421193-3421261	68	DEL	Lenient	0.135338
8378	chr12:3447649-3448910	1261	DEL	Lenient	0.639098
8379	chr12:3456190-3456508	318	DEL	Lenient	0.112782
8381	chr12:3937892-3937959	67	DEL	Lenient	0.0733083
8382	chr12:3987241-3989466	2225	DEL	Stringent	0.595865
8383	chr12:4080902-4082808	1906	DEL	Lenient	0.445489
8384	chr12:4171630-4171752	122	DEL	Lenient	0.0582707
8385	chr12:4329822-4329907	85	DEL	Lenient	0.898496
8386	chr12:4396971-4397512	541	DEL	Lenient	0.580827
8388	chr12:4471055-4474054	2999	DEL	Stringent	0.860902
8389	chr12:4715972-4716185	213	DEL	Lenient	0.131579
8390	chr12:4754489-4754952	463	DEL	Stringent	0.43985
8391	chr12:4792556-4794715	2159	DEL	Lenient	0.0488722
8392	chr12:4799627-4799678	51	DEL	Lenient	0.105263
8393	chr12:4856578-4856643	65	DEL	Lenient	0.406015
8394	chr12:4859754-4860305	551	DEL	Lenient	0.182331
8395	chr12:4882846-4884274	1428	DEL	Lenient	0.671053
8396	chr12:4941225-4946135	4910	DEL	Lenient	0.464286
8397	chr12:4975606-4975664	58	DEL	Lenient	0.315789
8398	chr12:4994753-4994839	86	DEL	Lenient	0.056391
8399	chr12:5007473-5007661	188	DEL	Lenient	0.210526
8400	chr12:5025984-5027971	1987	DEL	Lenient	0.12782
8401	chr12:5274923-5275013	90	DEL	Lenient	0.345865
8402	chr12:5379033-5379299	266	DEL	Lenient	0.849624
8404	chr12:5591953-5593748	1795	DEL	Lenient	0.0714286
8405	chr12:5602312-5603558	1246	DEL	Lenient	0.174812
8407	chr12:5727076-5728135	1059	DEL	Stringent	0.0018797
8408	chr12:5764575-5766431	1856	DEL	Stringent	0.0018797
8409	chr12:5771687-5771888	201	DEL	Stringent	0.0018797
8410	chr12:5773684-5774571	887	DEL	Stringent	0.0018797
8411	chr12:5788117-5789273	1156	DEL	Stringent	0.0018797
8412	chr12:5795794-5796508	714	DEL	Lenient	0.605263
8413	chr12:5883869-5884366	497	DEL	Lenient	0.597744
8414	chr12:5929140-5929501	361	DEL	Lenient	0.120301
8415	chr12:5958356-5959518	1162	DEL	Stringent	0.714286
8416	chr12:6021618-6021963	345	DEL	Lenient	0.293233
8417	chr12:6080315-6080382	67	DEL	Lenient	0.018797
8418	chr12:6109049-6109759	710	DEL	Stringent	0.018797
8419	chr12:6210870-6214785	3915	DEL	Stringent	0.0131579	validated
8420	chr12:6216834-6217917	1083	DEL	Stringent	0.0225564
8421	chr12:6321937-6322920	983	DEL	Stringent	0.154135
8423	chr12:6339722-6341434	1712	DEL	Lenient	0.0958647
8424	chr12:6347076-6362129	15053	DEL	Stringent	0.0263158
8425	chr12:6368594-6368674	80	DEL	Lenient	0.0695489
8426	chr12:6371701-6371754	53	DEL	Lenient	0.0864662
8427	chr12:6378528-6387626	9098	DEL	Lenient	0.0883459
8428	chr12:6395765-6395878	113	DEL	Lenient	0.0413534
8429	chr12:6486076-6486247	171	DEL	Lenient	0.137218
8430	chr12:6600298-6609386	9088	DEL	Lenient	0.770677
8431	chr12:6632418-6632558	140	DEL	Lenient	0.612782
8432	chr12:6635290-6637736	2446	DEL	Lenient	0.530075
8434	chr12:6649943-6650487	544	DEL	Lenient	0.18797
8435	chr12:6650514-6650914	400	DEL	Lenient	0.157895
8436	chr12:6677931-6679516	1585	DEL	Stringent	0.0056391
8437	chr12:6731954-6733226	1272	DEL	Stringent	0.103383
8438	chr12:6783558-6783894	336	DEL	Lenient	0.259398
8439	chr12:6840336-6841415	1079	DEL	Stringent	0.18797
8440	chr12:6906973-6907276	303	DEL	Lenient	0.582707
8442	chr12:7246479-7247356	877	DEL	Stringent	0.0394737
8443	chr12:7274858-7275196	338	DEL	Lenient	0.488722
8444	chr12:7277907-7280014	2107	DEL	Lenient	0.56203
8445	chr12:7308888-7309659	771	DEL	Stringent	0.193609
8446	chr12:7321258-7325186	3928	DEL	Stringent	0.0432331
8447	chr12:7373911-7374053	142	DEL	Lenient	0.328947
8448	chr12:7519822-7521392	1570	DEL	Lenient	0.140977
8449	chr12:7526059-7526153	94	DEL	Lenient	0.68985
8450	chr12:7527843-7527903	60	DEL	Lenient	0.697368
8451	chr12:7563521-7566366	2845	DEL	Lenient	0.541353
8452	chr12:7692907-7693091	184	DEL	Lenient	0.018797
8453	chr12:7758896-7759972	1076	DEL	Stringent	0.0394737
8454	chr12:7783033-7783239	206	DEL	Lenient	0.406015
8456	chr12:7842092-7843364	1272	DEL	Stringent	0.214286
8457	chr12:7995023-7995283	260	DEL	Lenient	0.0169173
8458	chr12:8007486-8007653	167	DEL	Lenient	0.018797
8459	chr12:8098366-8098471	105	DEL	Lenient	0.417293
8460	chr12:8215125-8216781	1656	DEL	Lenient	0.142857
8461	chr12:8371765-8372755	990	DEL	Stringent	0.0507519
8462	chr12:8386215-8387256	1041	DEL	Lenient	0.218045
8463	chr12:8478160-8478599	439	DEL	Stringent	0.146617
8464	chr12:8490371-8492031	1660	DEL	Lenient	0.133459
8465	chr12:8499950-8500079	129	DEL	Lenient	0.133459
8466	chr12:8559823-8560436	613	DEL	Lenient	0.180451
8467	chr12:8669906-8670159	253	DEL	Lenient	0.0263158
8468	chr12:8682485-8682552	67	DEL	Lenient	0.169173
8469	chr12:8705366-8706703	1337	DEL	Lenient	0.315789
8470	chr12:9040538-9041700	1162	DEL	Stringent	0.219925
8471	chr12:9057385-9057499	114	DEL	Lenient	0.0357143
8472	chr12:9144599-9146455	1856	DEL	Lenient	0.0169173
8473	chr12:9205826-9207701	1875	DEL	Stringent	0.0225564
8474	chr12:9526406-9526584	178	DEL	Lenient	0.490602
8475	chr12:9747776-9749291	1515	DEL	Stringent	0.0169173
8476	chr12:9759011-9759760	749	DEL	Stringent	0.0263158
8478	chr12:9770246-9770335	89	DEL	Lenient	0.0169173
8479	chr12:9944431-9947399	2968	DEL	Stringent	0.0112782
8480	chr12:9965112-9965220	108	DEL	Lenient	0.278196	validated
8481	chr12:10186460-10188467	2007	DEL	Stringent	0.0018797
8483	chr12:11106056-11106535	479	DEL	Stringent	0.101504
8485	chr12:11650123-11650176	53	DEL	Lenient	0.0338346
8486	chr12:11697376-11697894	518	DEL	Lenient	0.0319549
8487	chr12:11798559-11807086	8527	DEL	Lenient	0.659774
8488	chr12:11849011-11853079	4068	DEL	Stringent	0.659774
8489	chr12:11872896-11873262	366	DEL	Lenient	0.723684
8490	chr12:11969348-11970415	1067	DEL	Lenient	0.447368
8491	chr12:12685728-12685863	135	DEL	Lenient	0.0093985
8492	chr12:12759230-12759287	57	DEL	Lenient	0.18985
8493	chr12:12764326-12764904	578	DEL	Stringent	0.0093985
8494	chr12:12772436-12772712	276	DEL	Lenient	0.609023
8495	chr12:12897307-12897911	604	DEL	Lenient	0.650376
8496	chr12:14097729-14099936	2207	DEL	Lenient	0.815789
8497	chr12:14283602-14284237	635	DEL	Stringent	0.0921053
8498	chr12:14922028-14922098	70	DEL	Lenient	0.300752
8499	chr12:15263223-15264513	1290	DEL	Stringent	0.0676692
8501	chr12:15794908-15795468	560	DEL	Stringent	0.531955
8505	chr12:16436915-16438589	1674	DEL	Lenient	0.0206767
8507	chr12:16895844-16896157	313	DEL	Lenient	0.469925
8508	chr12:16944405-16944913	508	DEL	Lenient	0.979323
8509	chr12:17201735-17210319	8584	DEL	Lenient	0.0902256
8510	chr12:17247506-17248163	657	DEL	Lenient	0.221805
8511	chr12:17250990-17251260	270	DEL	Lenient	0.210526
8512	chr12:17257601-17257741	140	DEL	Lenient	0.114662
8513	chr12:17344326-17345485	1159	DEL	Stringent	0.0206767
8514	chr12:17559254-17559406	152	DEL	Lenient	0.254717
8515	chr12:17703817-17704095	278	DEL	Lenient	0.765038
8516	chr12:17729575-17730556	981	DEL	Lenient	0.471804
8517	chr12:17828770-17831864	3094	DEL	Lenient	0.327068
8532	chr12:18484802-18484927	125	DEL	Lenient	0.351504
8533	chr12:18662018-18662547	529	DEL	Stringent	0.941729
8534	chr12:19758643-19758797	154	DEL	Lenient	0.387218
8535	chr12:19760916-19761415	499	DEL	Stringent	0.261278
8536	chr12:19845194-19845258	64	DEL	Lenient	0.319549
8537	chr12:20175531-20177411	1880	DEL	Lenient	0.0225564
8539	chr12:20679523-20679582	59	DEL	Lenient	0.0244361
8540	chr12:21301685-21302185	500	DEL	Stringent	0.892857
8543	chr12:21880788-21882002	1214	DEL	Stringent	0.0582707
8544	chr12:21988643-21988761	118	DEL	Stringent	0.0037594
8545	chr12:22516446-22516560	114	DEL	Lenient	0.749057
8547	chr12:22979807-22986827	7020	DEL	Stringent	0.12782
8548	chr12:23141622-23141712	90	DEL	Lenient	0.268797
8550	chr12:23417639-23417708	69	DEL	Lenient	0.0131579
8552	chr12:23987273-23989344	2071	DEL	Stringent	0.0037594
8553	chr12:24016619-24016691	72	DEL	Lenient	0.18985
8554	chr12:24131653-24132783	1130	DEL	Lenient	0.845865
8555	chr12:24321555-24324150	2595	DEL	Lenient	0.293233
8556	chr12:24481095-24482298	1203	DEL	Lenient	0.424812
8557	chr12:24606561-24606785	224	DEL	Stringent	0.911654
8559	chr12:25163857-25163929	72	DEL	Lenient	0.0789474
8560	chr12:25381121-25381250	129	DEL	Lenient	0.118421
8561	chr12:26389991-26390282	291	DEL	Stringent	0.0206767
8562	chr12:26617592-26620743	3151	DEL	Lenient	0.0206767
8563	chr12:26661685-26665996	4311	DEL	Stringent	0.0488722
8565	chr12:27055161-27055780	619	DEL	Lenient	0.0921053
8566	chr12:27192441-27192516	75	DEL	Lenient	0.0319549
8567	chr12:27224039-27224409	370	DEL	Stringent	0.0281955
8568	chr12:27408631-27410743	2112	DEL	Stringent	0.0394737
8569	chr12:27871565-27877132	5567	DEL	Stringent	0.0169173
8570	chr12:27998660-27998730	70	DEL	Lenient	0.68609
8572	chr12:28279399-28283054	3655	DEL	Lenient	0.609023
8574	chr12:29227393-29227816	423	DEL	Lenient	0.345865
8576	chr12:30886929-30887404	475	DEL	Stringent	0.0112782
8578	chr12:31165066-31167955	2889	DEL	Lenient	0.603383
8579	chr12:31222379-31230748	8369	DEL	Lenient	0.642857
8581	chr12:32802400-32803206	806	DEL	Lenient	0.605263
8583	chr12:33025967-33026280	313	DEL	Lenient	0.270677
8584	chr12:33326633-33329240	2607	DEL	Lenient	0.0526316
8585	chr12:33655010-33656559	1549	DEL	Stringent	0.567669
8586	chr12:34107207-34107706	499	DEL	Lenient	0.193609
8587	chr12:34466070-34466171	101	DEL	Lenient	0.234962
8589	chr12:35172658-35173370	712	DEL	Stringent	0.0018797
8590	chr12:35398815-35399393	578	DEL	Stringent	0.661654
8591	chr12:35953851-35954887	1036	DEL	Lenient	0.0864662
8592	chr12:35956382-35956698	316	DEL	Lenient	0.0864662		ENSBTAG00000011726(CRYL1)
8595	chr12:37020764-37022980	2216	DEL	Stringent	0.0056391	validated
8596	chr12:37099572-37099689	117	DEL	Lenient	0.589015
8597	chr12:37106665-37112243	5578	DEL	Lenient	0.601504
8599	chr12:37141621-37144737	3116	DEL	Lenient	0.276316
8600	chr12:37439675-37440251	576	DEL	Stringent	0.616541
8601	chr12:37457688-37458181	493	DEL	Stringent	0.616541
8602	chr12:37513581-37515473	1892	DEL	Stringent	0.0526316
8603	chr12:37528887-37529598	711	DEL	Stringent	0.0526316
8604	chr12:37546607-37547713	1106	DEL	Lenient	0.0037594
8607	chr12:37627849-37628191	342	DEL	Stringent	0.0037594
8608	chr12:37637799-37639525	1726	DEL	Stringent	0.0037594
8609	chr12:37645181-37645274	93	DEL	Stringent	0.0037594
8610	chr12:37704962-37705086	124	DEL	Stringent	0.0018797
8611	chr12:37883496-37883597	101	DEL	Lenient	0.426692
8612	chr12:37897403-37897649	246	DEL	Lenient	0.201128
8613	chr12:37971065-37971781	716	DEL	Stringent	0.0037594
8614	chr12:38047242-38047546	304	DEL	Lenient	0.359023
8615	chr12:38121761-38121901	140	DEL	Lenient	0.314394
8616	chr12:38195220-38195349	129	DEL	Lenient	0.231203
8617	chr12:38282636-38285410	2774	DEL	Lenient	0.550752
8618	chr12:38301514-38301590	76	DEL	Lenient	0.35283
8619	chr12:38482093-38482183	90	DEL	Lenient	0.545283
8620	chr12:38511544-38512139	595	DEL	Lenient	0.146617
8621	chr12:38610854-38610947	93	DEL	Lenient	0.0357143
8622	chr12:38751136-38751448	312	DEL	Lenient	0.462406
8623	chr12:38774861-38775552	691	DEL	Lenient	0.490602
[truncated: 11,733 more rows]

## Sheet: Supplementary_Table 2
Proband	Sire	Dam
Damona-GIGA-ULiège-2	Damona-GIGA-ULiège-739	Damona-GIGA-ULiège-405
Damona-GIGA-ULiège-19	Damona-GIGA-ULiège-220	Damona-GIGA-ULiège-696
Damona-GIGA-ULiège-21	Damona-GIGA-ULiège-220	Damona-GIGA-ULiège-694
Damona-GIGA-ULiège-25	Damona-GIGA-ULiège-502	Damona-GIGA-ULiège-706
Damona-GIGA-ULiège-28	Damona-GIGA-ULiège-687	Damona-GIGA-ULiège-707
Damona-GIGA-ULiège-30	Damona-GIGA-ULiège-502	Damona-GIGA-ULiège-705
Damona-GIGA-ULiège-35	Damona-GIGA-ULiège-220	Damona-GIGA-ULiège-694
Damona-GIGA-ULiège-37	Damona-GIGA-ULiège-502	Damona-GIGA-ULiège-709
Damona-GIGA-ULiège-38	Damona-GIGA-ULiège-502	Damona-GIGA-ULiège-705
Damona-GIGA-ULiège-40	Damona-GIGA-ULiège-502	Damona-GIGA-ULiège-504
Damona-GIGA-ULiège-44	Damona-GIGA-ULiège-502	Damona-GIGA-ULiège-709
Damona-GIGA-ULiège-45	Damona-GIGA-ULiège-502	Damona-GIGA-ULiège-709
Damona-GIGA-ULiège-46	Damona-GIGA-ULiège-503	Damona-GIGA-ULiège-700
Damona-GIGA-ULiège-48	Damona-GIGA-ULiège-503	Damona-GIGA-ULiège-709
Damona-GIGA-ULiège-58	Damona-GIGA-ULiège-221	Damona-GIGA-ULiège-700
Damona-GIGA-ULiège-63	Damona-GIGA-ULiège-688	Damona-GIGA-ULiège-26
Damona-GIGA-ULiège-66	Damona-GIGA-ULiège-692	Damona-GIGA-ULiège-712
Damona-GIGA-ULiège-69	Damona-GIGA-ULiège-690	Damona-GIGA-ULiège-29
Damona-GIGA-ULiège-70	Damona-GIGA-ULiège-690	Damona-GIGA-ULiège-43
Damona-GIGA-ULiège-78	Damona-GIGA-ULiège-223	Damona-GIGA-ULiège-698
Damona-GIGA-ULiège-80	Damona-GIGA-ULiège-692	Damona-GIGA-ULiège-712
Damona-GIGA-ULiège-81	Damona-GIGA-ULiège-690	Damona-GIGA-ULiège-29
Damona-GIGA-ULiège-86	Damona-GIGA-ULiège-23	Damona-GIGA-ULiège-699
Damona-GIGA-ULiège-87	Damona-GIGA-ULiège-23	Damona-GIGA-ULiège-699
Damona-GIGA-ULiège-89	Damona-GIGA-ULiège-729	Damona-GIGA-ULiège-705
Damona-GIGA-ULiège-90	Damona-GIGA-ULiège-729	Damona-GIGA-ULiège-705
Damona-GIGA-ULiège-91	Damona-GIGA-ULiège-20	Damona-GIGA-ULiège-709
Damona-GIGA-ULiège-92	Damona-GIGA-ULiège-20	Damona-GIGA-ULiège-705
Damona-GIGA-ULiège-93	Damona-GIGA-ULiège-690	Damona-GIGA-ULiège-709
Damona-GIGA-ULiège-94	Damona-GIGA-ULiège-691	Damona-GIGA-ULiège-30
Damona-GIGA-ULiège-98	Damona-GIGA-ULiège-691	Damona-GIGA-ULiège-709
Damona-GIGA-ULiège-99	Damona-GIGA-ULiège-728	Damona-GIGA-ULiège-704
Damona-GIGA-ULiège-100	Damona-GIGA-ULiège-690	Damona-GIGA-ULiège-31
Damona-GIGA-ULiège-101	Damona-GIGA-ULiège-39	Damona-GIGA-ULiège-30
Damona-GIGA-ULiège-103	Damona-GIGA-ULiège-729	Damona-GIGA-ULiège-34
Damona-GIGA-ULiège-108	Damona-GIGA-ULiège-728	Damona-GIGA-ULiège-38
Damona-GIGA-ULiège-120	Damona-GIGA-ULiège-691	Damona-GIGA-ULiège-30
Damona-GIGA-ULiège-134	Damona-GIGA-ULiège-39	Damona-GIGA-ULiège-41
Damona-GIGA-ULiège-137	Damona-GIGA-ULiège-708	Damona-GIGA-ULiège-108
Damona-GIGA-ULiège-138	Damona-GIGA-ULiège-697	Damona-GIGA-ULiège-73
Damona-GIGA-ULiège-141	Damona-GIGA-ULiège-695	Damona-GIGA-ULiège-27
Damona-GIGA-ULiège-142	Damona-GIGA-ULiège-697	Damona-GIGA-ULiège-711
Damona-GIGA-ULiège-144	Damona-GIGA-ULiège-61	Damona-GIGA-ULiège-711
Damona-GIGA-ULiège-145	Damona-GIGA-ULiège-62	Damona-GIGA-ULiège-26
Damona-GIGA-ULiège-148	Damona-GIGA-ULiège-693	Damona-GIGA-ULiège-27
Damona-GIGA-ULiège-151	Damona-GIGA-ULiège-697	Damona-GIGA-ULiège-32
Damona-GIGA-ULiège-159	Damona-GIGA-ULiège-701	Damona-GIGA-ULiège-74
Damona-GIGA-ULiège-160	Damona-GIGA-ULiège-85	Damona-GIGA-ULiège-77
Damona-GIGA-ULiège-164	Damona-GIGA-ULiège-708	Damona-GIGA-ULiège-66
Damona-GIGA-ULiège-174	Damona-GIGA-ULiège-702	Damona-GIGA-ULiège-103
Damona-GIGA-ULiège-177	Damona-GIGA-ULiège-40	Damona-GIGA-ULiège-144
Damona-GIGA-ULiège-182	Damona-GIGA-ULiège-82	Damona-GIGA-ULiège-80
Damona-GIGA-ULiège-189	Damona-GIGA-ULiège-22	Damona-GIGA-ULiège-37
Damona-GIGA-ULiège-190	Damona-GIGA-ULiège-708	Damona-GIGA-ULiège-53
Damona-GIGA-ULiège-197	Damona-GIGA-ULiège-40	Damona-GIGA-ULiège-144
Damona-GIGA-ULiège-200	Damona-GIGA-ULiège-708	Damona-GIGA-ULiège-30
Damona-GIGA-ULiège-201	Damona-GIGA-ULiège-33	Damona-GIGA-ULiège-37
Damona-GIGA-ULiège-207	Damona-GIGA-ULiège-33	Damona-GIGA-ULiège-37
Damona-GIGA-ULiège-208	Damona-GIGA-ULiège-708	Damona-GIGA-ULiège-147
Damona-GIGA-ULiège-210	Damona-GIGA-ULiège-36	Damona-GIGA-ULiège-143
Damona-GIGA-ULiège-214	Damona-GIGA-ULiège-733	Damona-GIGA-ULiège-91
Damona-GIGA-ULiège-217	Damona-GIGA-ULiège-67	Damona-GIGA-ULiège-148
Damona-GIGA-ULiège-225	Damona-GIGA-ULiège-732	Damona-GIGA-ULiège-159
Damona-GIGA-ULiège-235	Damona-GIGA-ULiège-36	Damona-GIGA-ULiège-155
Damona-GIGA-ULiège-246	Damona-GIGA-ULiège-730	Damona-GIGA-ULiège-103
Damona-GIGA-ULiège-248	Damona-GIGA-ULiège-689	Damona-GIGA-ULiège-101
Damona-GIGA-ULiège-256	Damona-GIGA-ULiège-730	Damona-GIGA-ULiège-93
Damona-GIGA-ULiège-257	Damona-GIGA-ULiège-42	Damona-GIGA-ULiège-93
Damona-GIGA-ULiège-266	Damona-GIGA-ULiège-730	Damona-GIGA-ULiège-103
Damona-GIGA-ULiège-268	Damona-GIGA-ULiège-730	Damona-GIGA-ULiège-103
Damona-GIGA-ULiège-276	Damona-GIGA-ULiège-42	Damona-GIGA-ULiège-93
Damona-GIGA-ULiège-278	Damona-GIGA-ULiège-703	Damona-GIGA-ULiège-191
Damona-GIGA-ULiège-279	Damona-GIGA-ULiège-703	Damona-GIGA-ULiège-199
Damona-GIGA-ULiège-280	Damona-GIGA-ULiège-52	Damona-GIGA-ULiège-84
Damona-GIGA-ULiège-306	Damona-GIGA-ULiège-201	Damona-GIGA-ULiège-212
Damona-GIGA-ULiège-311	Damona-GIGA-ULiège-52	Damona-GIGA-ULiège-148
Damona-GIGA-ULiège-320	Damona-GIGA-ULiège-51	Damona-GIGA-ULiège-212
Damona-GIGA-ULiège-324	Damona-GIGA-ULiège-51	Damona-GIGA-ULiège-228
Damona-GIGA-ULiège-331	Damona-GIGA-ULiège-47	Damona-GIGA-ULiège-266
Damona-GIGA-ULiège-332	Damona-GIGA-ULiège-49	Damona-GIGA-ULiège-63
Damona-GIGA-ULiège-336	Damona-GIGA-ULiège-47	Damona-GIGA-ULiège-266
Damona-GIGA-ULiège-342	Damona-GIGA-ULiège-70	Damona-GIGA-ULiège-228
Damona-GIGA-ULiège-346	Damona-GIGA-ULiège-52	Damona-GIGA-ULiège-211
Damona-GIGA-ULiège-347	Damona-GIGA-ULiège-70	Damona-GIGA-ULiège-134
Damona-GIGA-ULiège-362	Damona-GIGA-ULiège-703	Damona-GIGA-ULiège-256
Damona-GIGA-ULiège-364	Damona-GIGA-ULiège-52	Damona-GIGA-ULiège-189
Damona-GIGA-ULiège-370	Damona-GIGA-ULiège-703	Damona-GIGA-ULiège-153
Damona-GIGA-ULiège-388	Damona-GIGA-ULiège-735	Damona-GIGA-ULiège-118
Damona-GIGA-ULiège-389	Damona-GIGA-ULiège-735	Damona-GIGA-ULiège-118
Damona-GIGA-ULiège-394	Damona-GIGA-ULiège-24	Damona-GIGA-ULiège-202
Damona-GIGA-ULiège-395	Damona-GIGA-ULiège-127	Damona-GIGA-ULiège-306
Damona-GIGA-ULiège-396	Damona-GIGA-ULiège-739	Damona-GIGA-ULiège-304
Damona-GIGA-ULiège-402	Damona-GIGA-ULiège-734	Damona-GIGA-ULiège-137
Damona-GIGA-ULiège-403	Damona-GIGA-ULiège-735	Damona-GIGA-ULiège-226
Damona-GIGA-ULiège-410	Damona-GIGA-ULiège-734	Damona-GIGA-ULiège-279
Damona-GIGA-ULiège-416	Damona-GIGA-ULiège-736	Damona-GIGA-ULiège-210
Damona-GIGA-ULiège-418	Damona-GIGA-ULiège-24	Damona-GIGA-ULiège-202
Damona-GIGA-ULiège-419	Damona-GIGA-ULiège-736	Damona-GIGA-ULiège-210
Damona-GIGA-ULiège-420	Damona-GIGA-ULiège-95	Damona-GIGA-ULiège-311
Damona-GIGA-ULiège-429	Damona-GIGA-ULiège-735	Damona-GIGA-ULiège-149
Damona-GIGA-ULiège-431	Damona-GIGA-ULiège-95	Damona-GIGA-ULiège-311
Damona-GIGA-ULiège-434	Damona-GIGA-ULiège-735	Damona-GIGA-ULiège-258
Damona-GIGA-ULiège-437	Damona-GIGA-ULiège-201	Damona-GIGA-ULiège-258
Damona-GIGA-ULiège-449	Damona-GIGA-ULiège-16	Damona-GIGA-ULiège-171
Damona-GIGA-ULiège-481	Damona-GIGA-ULiège-738	Damona-GIGA-ULiège-256
Damona-GIGA-ULiège-486	Damona-GIGA-ULiège-739	Damona-GIGA-ULiège-304
Damona-GIGA-ULiège-488	Damona-GIGA-ULiège-201	Damona-GIGA-ULiège-416
Damona-GIGA-ULiège-515	Damona-GIGA-ULiège-731	Damona-GIGA-ULiège-397
Damona-GIGA-ULiège-520	Damona-GIGA-ULiège-738	Damona-GIGA-ULiège-416
Damona-GIGA-ULiège-536	Damona-GIGA-ULiège-268	Damona-GIGA-ULiège-378
Damona-GIGA-ULiège-541	Damona-GIGA-ULiège-740	Damona-GIGA-ULiège-446
Damona-GIGA-ULiège-554	Damona-GIGA-ULiège-268	Damona-GIGA-ULiège-434
Damona-GIGA-ULiège-568	Damona-GIGA-ULiège-739	Damona-GIGA-ULiège-422
Damona-GIGA-ULiège-571	Damona-GIGA-ULiège-739	Damona-GIGA-ULiège-408
Damona-GIGA-ULiège-578	Damona-GIGA-ULiège-739	Damona-GIGA-ULiège-405
Damona-GIGA-ULiège-581	Damona-GIGA-ULiège-736	Damona-GIGA-ULiège-405
Damona-GIGA-ULiège-584	Damona-GIGA-ULiège-736	Damona-GIGA-ULiège-500
Damona-GIGA-ULiège-593	Damona-GIGA-ULiège-736	Damona-GIGA-ULiège-219
Damona-GIGA-ULiège-595	Damona-GIGA-ULiège-739	Damona-GIGA-ULiège-384
Damona-GIGA-ULiège-596	Damona-GIGA-ULiège-318	Damona-GIGA-ULiège-411
Damona-GIGA-ULiège-599	Damona-GIGA-ULiège-739	Damona-GIGA-ULiège-520
Damona-GIGA-ULiège-614	Damona-GIGA-ULiège-739	Damona-GIGA-ULiège-378
Damona-GIGA-ULiège-616	Damona-GIGA-ULiège-488	Damona-GIGA-ULiège-508
Damona-GIGA-ULiège-634	Damona-GIGA-ULiège-253	Damona-GIGA-ULiège-536
Damona-GIGA-ULiège-680	Damona-GIGA-ULiège-420	Damona-GIGA-ULiège-435
Damona-GIGA-ULiège-710	Damona-GIGA-ULiège-222	Damona-GIGA-ULiège-224
Damona-GIGA-ULiège-713	Damona-GIGA-ULiège-318	Damona-GIGA-ULiège-419
